# Supplementary material for: Protocol for a randomised controlled trial comparing warfarin with no oral anticoagulation in patients with atrial fibrillation on chronic dialysis: the Danish Warfarin-Dialysis (DANWARD) trial
Source: PubMed Central journal article supplement — BMJ Open. 2024 Feb 26;14(2):e081961. doi: 10.1136/bmjopen-2023-081961 (PMC10900386; doi:10.1136/bmjopen-2023-081961), 2024-02-26
Supplement: bmjopen-2023-081961supp001.pdf [file bmjopen-2023-081961supp001.pdf]

## DANWARD: Supplemental material

# Supplemental material

Supplementary Table S1: Trial sites

Supplementary Table S2: Participants of the DANWARD study

Supplementary Table S3: Trial Registration Data Set

Supplementary Figure S1: 1-year standardized risk of A) stroke and B) major bleeding

Supplementary Figure S2: Sample size calculation

Supplementary Appendix 1: Protocol version 1.26, February 17, 2023

Supplementary Appendix 2: Informed consent materials (in Danish)

## DANWARD: Supplemental material

**Supplementary Table S1: Trial sites**

Aalborg University Hospital, Mølleparkvej 4, 9000 Aalborg, Denmark

Aarhus University Hospital, Palle Juul-Jensens Boulevard 99, 8200 Aarhus, Denmark

Esbjerg and Grindsted Hospital, Finsensgade 35, 6700 Esbjerg, Denmark

Herlev and Gentofte Hospital, Borgmester Ib Juuls Vej 1, 2730 Herlev, Denmark

Holbæk Hospital, Smedelundsgade 60, 4300 Holbæk, Denmark

Bornholm Hospital, Ullasvej 8, 3700 Rønne, Denmark

Hospital of Southern Jutland, Sydvang 1, 6400 Sønderborg, Denmark

Gødstrup Regional Hospital, Hospitalsparken 15, Herning, Denmark

Lillebælt Hospital, Sygehusvej 24, 6000 Kolding, Denmark

Copenhagen University Hospital – North Zealand, Dyrehavevej 29, 3400 Hillerød, Denmark

Rigshospitalet, Copenhagen University Hospital, Blegdamsvej 9, 2100 København, Denmark

Viborg Regional Hospital, Heibergs Alle 5A, 8800 Viborg, Denmark

Zealand University Hospital, Sygehusvej 10, 4000 Roskilde, Denmark

## DANWARD: Supplemental material

| <b>Supplementary Table S2: Trial Registration Data Set</b> |                                                                                                                                                                                                                                                                                                                                                       |
|------------------------------------------------------------|-------------------------------------------------------------------------------------------------------------------------------------------------------------------------------------------------------------------------------------------------------------------------------------------------------------------------------------------------------|
| Data category                                              | Information                                                                                                                                                                                                                                                                                                                                           |
| Primary registry and trial identifying number              | ClinicalTrials.gov: NCT03862859                                                                                                                                                                                                                                                                                                                       |
| Date of registration in primary registry                   | February 22, 2019                                                                                                                                                                                                                                                                                                                                     |
| Secondary identifying numbers                              | EUDRA-CT 2018-000484-86, CTIS ID 2022-502500-75-00.                                                                                                                                                                                                                                                                                                   |
| Source(s) of monetary or material support                  | The Danish Heart Foundation, the Augustinus Foundation                                                                                                                                                                                                                                                                                                |
| Primary sponsor                                            | Nicholas Carlson, Dept. of Nephrology, Copenhagen University Hospital – Rigshospitalet, Copenhagen, Denmark                                                                                                                                                                                                                                           |
| Secondary sponsor(s)                                       | None                                                                                                                                                                                                                                                                                                                                                  |
| Contact for public queries                                 | NC, ELFB                                                                                                                                                                                                                                                                                                                                              |
| Contact for scientific queries                             | NC, GG                                                                                                                                                                                                                                                                                                                                                |
| Public title                                               | The Danish Warfarin-Dialysis Study - Safety and Efficacy of Warfarin in Patients With Atrial Fibrillation on Dialysis                                                                                                                                                                                                                                 |
| Scientific title                                           | The Danish Warfarin-Dialysis Study: Safety and Efficacy of Warfarin in Patients With Atrial Fibrillation on Dialysis - A Nationwide Parallel-group Open Randomized Clinical Trial                                                                                                                                                                     |
| Countries of recruitment                                   | Denmark                                                                                                                                                                                                                                                                                                                                               |
| Health condition(s) or problem(s) studied                  | Atrial fibrillation, stroke, major bleed, end-stage renal disease                                                                                                                                                                                                                                                                                     |
| Intervention(s)                                            | Drug: Warfarin                                                                                                                                                                                                                                                                                                                                        |
| Key inclusion and exclusion criteria                       | Inclusion criteria: Adult patient ( $\geq 18$ years) with any atrial fibrillation on chronic dialysis<br>Exclusion criteria: CHA <sub>2</sub> DS <sub>2</sub> -VASc score $\leq 1$ , other indication for oral anticoagulation, contraindications for oral anticoagulation, participation in other intervention trials adjudged to influence outcomes |
| Study type                                                 | Interventional                                                                                                                                                                                                                                                                                                                                        |
| Date of first enrolment                                    | October 16, 2019                                                                                                                                                                                                                                                                                                                                      |
| Target sample size                                         | 718                                                                                                                                                                                                                                                                                                                                                   |
| Recruitment status                                         | Recruiting                                                                                                                                                                                                                                                                                                                                            |
| Primary outcome(s)                                         | Primary efficacy outcome: Fatal or non-fatal transient ischemic attack, ischemic stroke, or unspecified stroke<br>Primary safety outcome: Fatal or non-fatal major bleeding                                                                                                                                                                           |
| Key secondary outcomes                                     | All-cause mortality; combination of any non-fatal stroke and all-cause mortality; combination of any non-fatal stroke, any non-fatal major bleeding, and all-cause mortality                                                                                                                                                                          |

## DANWARD: Supplemental material

**Supplementary Table S3: Participants of the DANWARD study****Trial Steering Committee**

Alice S Nielsen, MD, Department of Medicine, Esbjerg Hospital, University Hospital of Southern Denmark, Denmark

Anne-Lise Kamper, MD DMSc, Department of Nephrology, Copenhagen University Hospital – Rigshospitalet, Denmark

Casper Bang, MD PhD Associate Professor, Department of Cardiology, Copenhagen University Hospital – Frederiksberg and Bispebjerg, Denmark

Christian D Peters, MD PhD Associate Professor, Department of Renal Medicine, Aarhus University Hospital, Denmark & Department of Clinical Medicine, Faculty of Health, Aarhus University, Denmark

Christian Torp-Pedersen, MD DMSc Professor, Department of Cardiology, Copenhagen University Hospital - North Zealand, Denmark

Ditte Hansen, MD PhD Associate Professor, Department of Nephrology, Copenhagen University Hospital – Herlev and Gentofte, Denmark & Department of Clinical Medicine, University of Copenhagen, Denmark

Donata Cibulskyte-Ninkovic, MD PhD, Department of Medicine, Lillebaelt Hospital, Denmark

Ellen LF Ballegaard, MD, Department of Nephrology, Copenhagen University Hospital -Rigshospitalet, Denmark & Department of Clinical Medicine, University of Copenhagen, Denmark

Erik Lerkevang Grove, MD, PhD, Associate Professor, Department of Cardiology, Aarhus University Hospital, Denmark & Department of Clinical Medicine, Faculty of Health, Aarhus University, Denmark

Finn T Nielsen, MD Associate Professor, Department of Medicine, Bornholm Hospital, Denmark & Department of Clinical Medicine, University of Copenhagen, Denmark

Frank H Mose, MD PhD Associate Professor, Department of Medicine, Gødstrup Regional Hospital, Denmark

Gunnar H Gislason, MD PhD Professor, Danish Heart Foundation & Department of Cardiology, Copenhagen University Hospital - Herlev and Gentofte, Denmark & Department of Clinical Medicine, University of Copenhagen, Denmark

Ida N Tietze, MD PhD, Department of Medicine, Viborg Regional Hospital, Denmark

Jan D Kampmann, MD, Department of Medicine, Hospital of Southern Jutland, Denmark

Jens D Jensen, MD PhD Associate professor, Department of Renal Medicine, Aarhus University Hospital, Denmark

Jesper M Rantanen, MD PhD, Department of Nephrology, Aalborg University Hospital, Denmark

Jonas B Olesen, MD PhD, Department of Cardiology, Copenhagen University Hospital – Herlev and Gentofte, Denmark

Kristine Lindhard, MD, Department of Nephrology, Copenhagen University Hospital – Herlev and Gentofte, Denmark

Lene Boesby, MD PhD, Department of Medicine, Zealand University Hospital, Denmark

Mads Hornum, MD PhD Professor, Department of Nephrology, Copenhagen University Hospital – Rigshospitalet, Denmark & Department of Clinical Medicine, University of Copenhagen, Denmark

Marianne Bertelsen, MD, Department of Endocrinology and Nephrology, Copenhagen University Hospital - North Zealand, Denmark

Marianne Rix, MD PhD, Department of Nephrology, Copenhagen University Hospital – Rigshospitalet, Denmark

## DANWARD: Supplemental material

Morten Lindhardt, MD PhD, Department of Medicine 1, Holbaek Hospital, Denmark & Department of Clinical Medicine, University of Copenhagen, Denmark

Morten Schou, MD PhD Professor, Department of Cardiology, Copenhagen University Hospital – Herlev and Gentofte, Denmark & Department of Clinical Medicine, University of Copenhagen, Denmark

Nicholas Carlson MD PhD, Department of Nephrology, Copenhagen University Hospital – Rigshospitalet, Denmark

Rikke Borg, MD PhD Associate Professor, Department of Medicine, Zealand University Hospital, Denmark & Department of Clinical Medicine, University of Copenhagen, Denmark

**Data safety monitoring committee**

Lars V Køber, MD DMSc Professor, Department of Cardiology, Copenhagen University Hospital – Rigshospitalet, Denmark

Peter Clausen, MD PhD, Department of Nephrology, Copenhagen University Hospital – Rigshospitalet, Denmark

Theis Lange, PhD Professor, Department of Public Health, University of Copenhagen, Denmark

**Sub investigators**

Dea Kofod, MD, Department of Nephrology, Copenhagen University Hospital - Rigshospitalet, Denmark & Department of Clinical Medicine, University of Copenhagen, Denmark

Iain Bressendorff, MD PhD, Department of Nephrology, Copenhagen University Hospital – Rigshospitalet, Denmark & Department of Nephrology, Copenhagen University Hospital – Herlev and Gentofte, Denmark

Johanne K Breinholt, MD, Department of Clinical Biochemistry, Esbjerg Hospital, University Hospital of Southern Denmark, Denmark

Julie MB Brøsen, MD PhD, Department of Endocrinology and Nephrology, Copenhagen University Hospital - North Zealand, Denmark

## DANWARD: Supplemental material

**Supplementary Figure 1: 1-year standardized risk of A) stroke and B) major bleeding**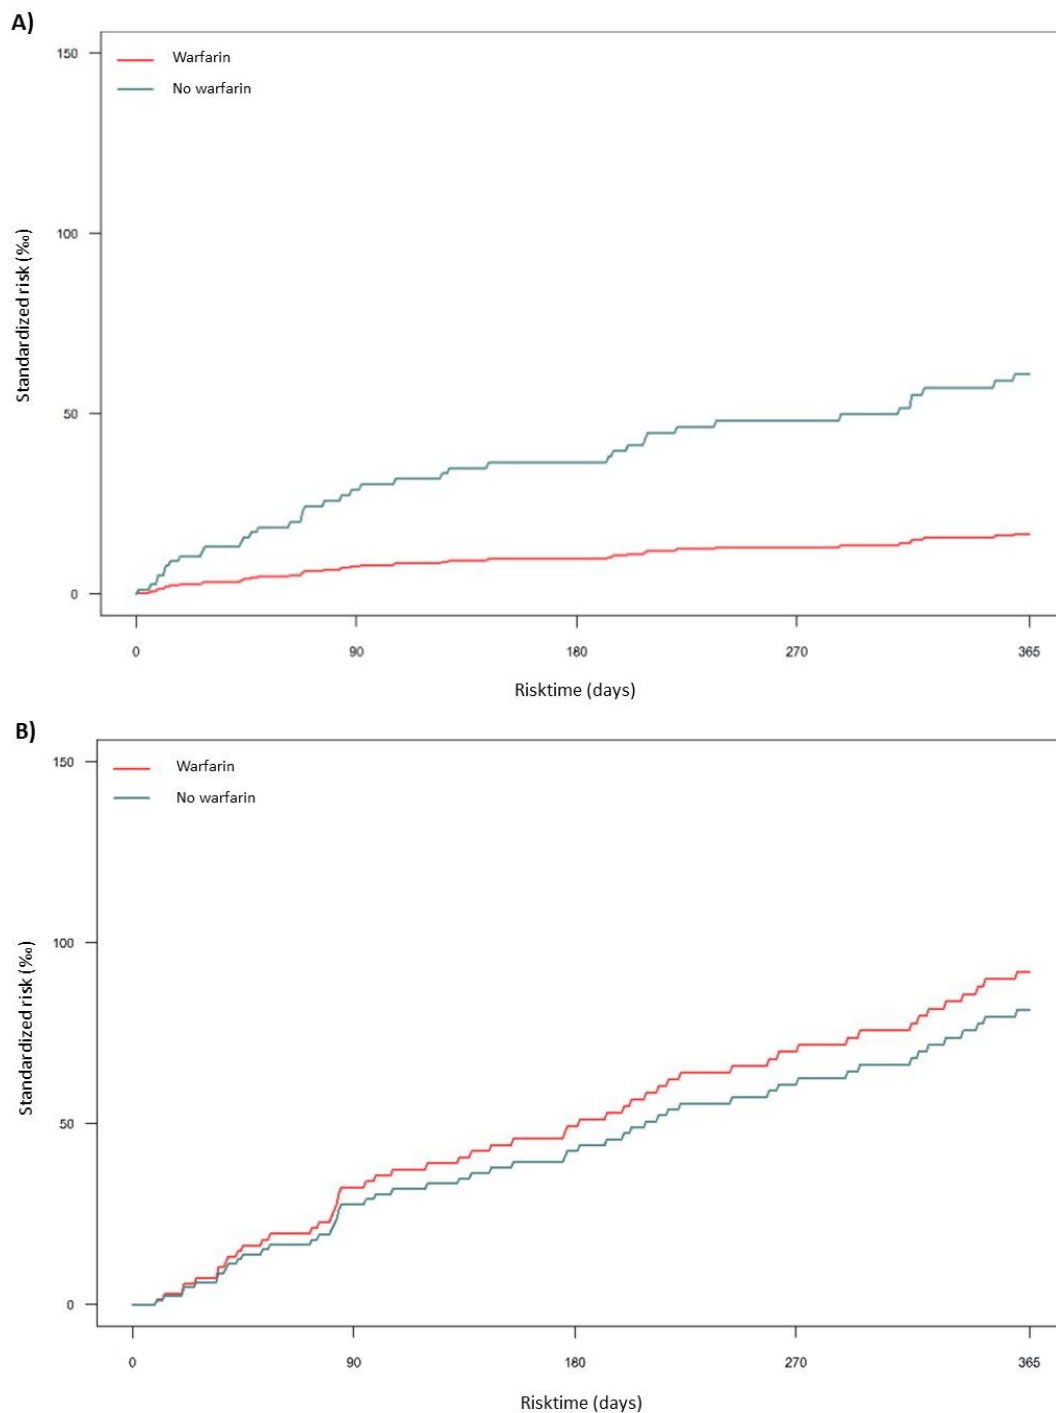

Predicted 1-year standardized risk of stroke and major bleeding in Danish patients with end-stage kidney disease and atrial fibrillation based on hazards ascertained in multiple cause specific Cox regression.

## DANWARD: Supplemental material

## Supplementary Figure S2: Sample size calculation

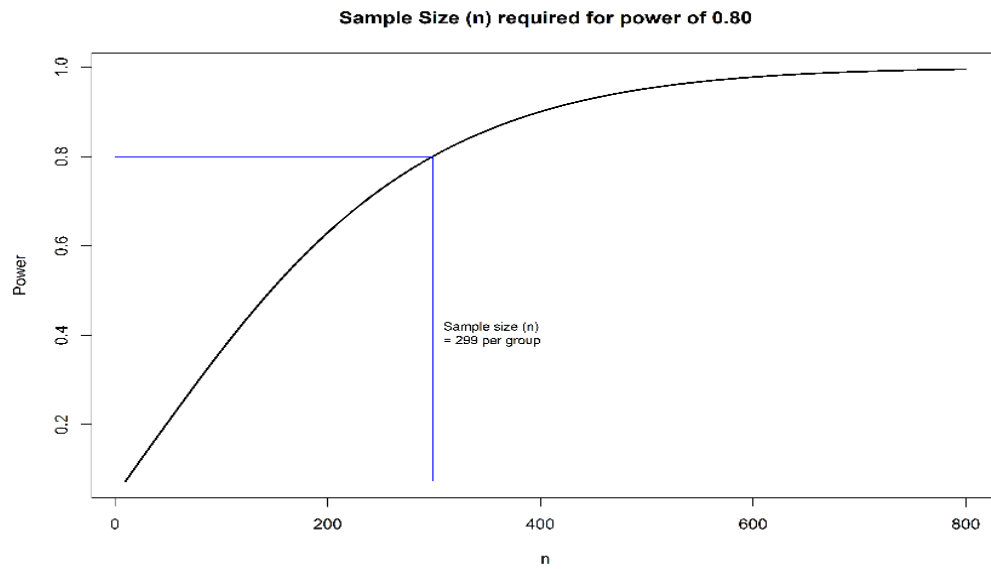

Sample size i.e. the number of patients (n) in each group is depicted with corresponding power, based on predicted one-year absolute risk of stroke.

**DAN-WAR-D** – Danish Warfarin-Dialysis Study (Research protocol, version 1.26, 17/2-23, EUDRACT 2018-000484-86, CTIS 2022-502500-75-00)

# **DAN-WAR-D**

## **Danish Warfarin-Dialysis Study**

**Safety and efficacy of warfarin in patients with atrial fibrillation on dialysis -**

**A nationwide parallel-group open randomized clinical trial**

---

## **Protocol**

**Coordinating Investigator / Sponsor**

**Nicholas Carlson MD PhD**

**Department of Nephrology, Rigshospitalet**

**Blegdamsvej 9, 2100 København**

**T. +45 35 45 59 27 / +45 35 45 35 45**



**DAN-WAR-D** – Danish Warfarin-Dialysis Study (Research protocol, version 1.26, 17/2-23, EUDRACT 2018-000484-86, CTIS 2022-502500-75-00)

## Table of Contents

|                                                       |    |
|-------------------------------------------------------|----|
| Introduction .....                                    | 3  |
| Atrial fibrillation in general populations .....      | 3  |
| Atrial fibrillation and end-stage renal disease ..... | 4  |
| Drug information: warfarin .....                      | 5  |
| Aims and objectives .....                             | 7  |
| Methods.....                                          | 7  |
| Study participants .....                              | 7  |
| Inclusion criteria .....                              | 8  |
| Exclusion criteria .....                              | 8  |
| Randomization of allocated treatment .....            | 10 |
| Data sources .....                                    | 12 |
| Monitoring via the Danish Health Care Registers.....  | 12 |
| Study data.....                                       | 13 |
| Follow-up.....                                        | 14 |
| Study end .....                                       | 15 |
| Study outcomes.....                                   | 15 |
| Statistical analyses.....                             | 18 |
| Pilot study.....                                      | 19 |
| Sample size calculation.....                          | 21 |
| Ethics.....                                           | 21 |
| Data Safety Monitoring Committee .....                | 21 |
| Premature trial termination.....                      | 22 |
| Safety Management.....                                | 22 |
| Study implementation.....                             | 24 |
| Initiation and maintenance of warfarin treatment..... | 25 |
| Research ethics approval.....                         | 27 |
| Funding.....                                          | 27 |

**DAN-WAR-D** – Danish Warfarin-Dialysis Study (Research protocol, version 1.26, 17/2-23, EUDRACT 2018-000484-86, CTIS 2022-502500-75-00)

|                                        |    |
|----------------------------------------|----|
| Modifications to the protocol.....     | 27 |
| Recruitment and informed consent ..... | 28 |
| Ethical considerations.....            | 29 |
| Data confidentiality .....             | 30 |
| Data sharing statement.....            | 30 |
| References .....                       | 31 |
| Appendix .....                         | 38 |

**DAN-WAR-D** – Danish Warfarin-Dialysis Study (Research protocol, version 1.26, 17/2-23, EUDRACT 2018-000484-86, CTIS 2022-502500-75-00)

## Introduction

Prevalence of dialysis-treated end-stage renal disease has remained stable at ~2.500 patients in Denmark throughout the past decade.<sup>1</sup> However, patients with end-stage renal disease continue to be at significantly increased risk of cardiovascular disease and mortality, and although cardiovascular outcomes have been observed to be improving in patients with end-stage renal disease, advances remains inferior to improvements observed in general populations.<sup>2</sup> As such, cardiovascular disease accounts for approximately 50% of mortalities in end-stage renal disease;<sup>3</sup> thereby contributing substantially to the observed annual mortality of >20% in the dialysis population.<sup>4</sup> Of note, incidence of myocardial infarction and stroke is 5- to 15-fold higher in dialysis-treated patients with end-stage renal disease,<sup>5,6</sup> and cardiovascular mortality is 10- to 30-fold higher compared with general populations.<sup>7</sup>

## Atrial fibrillation in general populations

Atrial fibrillation continues to be the most common sustained arrhythmia in general populations,<sup>8</sup> with growth in both prevalence and incidence observed throughout the past decade.<sup>9</sup> Presence of atrial fibrillation is associated with a 5-fold increase in risk of ischemic stroke,<sup>10</sup> and development and subsequent embolization of atrial thrombi may occur with any form of atrial fibrillation. However, treatment with oral anticoagulation is associated with a  $\frac{2}{3}$  reduction in risk of stroke based on cumulated data from multiple randomized trials comprising ~28.000 patients.<sup>11</sup> Notably, the efficacy of oral anticoagulation in patients with end-stage renal disease on dialysis remains wholly untested in prospective studies due to systematic exclusion from existing trials.

The decision to prescribe oral anticoagulation in patients is based on clinical assessment of net benefit i.e. is treatment-associated increase in risk of bleeding offset by the benefit on risk of stroke. Currently, treatment benefit is assessed using the CHA<sub>2</sub>DS<sub>2</sub>-VASc and HAS-BLED algorithms (Supplemental Table S1).<sup>12, 13</sup> The 2014 American College of Cardiology/American Heart Association guideline for management of patients with atrial fibrillation advocates oral anticoagulation if the CHA<sub>2</sub>DS<sub>2</sub>-VASc score is  $\geq 2$ .<sup>14</sup> Oral anticoagulation is essentially recommended in all patients irrespective of bleeding risk; however, a HAS-BLED score  $\geq 3$  indicates particular risk of bleeding obliging close monitoring of patients for risk mitigation, careful monitoring of international normalized ratios, and possibly individualized dosing of oral anticoagulation therapy. Similarly, the 2016 European Society of Cardiology guideline

**DAN-WAR-D** – Danish Warfarin-Dialysis Study (Research protocol, version 1.26, 17/2-23, EUDRACT 2018-000484-86, CTIS 2022-502500-75-00)

and the 2018 European Heart Rhythm Association guideline for management of atrial fibrillation also advocate oral anticoagulation for all patients based on the CHA<sub>2</sub>DS<sub>2</sub>-VASc score; however, patients at increased risk of bleeding should be identified and modifiable risk factors addressed.<sup>15, 16</sup>

### **Atrial fibrillation and end-stage renal disease**

Prevalence of atrial fibrillation is inversely correlated with renal function, and incidence is markedly increased in patients with end-stage renal disease.<sup>17-19</sup> An estimated one in five patients on dialysis due to end-stage renal disease suffer from atrial fibrillation, with incidence of new-onset atrial fibrillation ranging from 25 to 150 per 1.000 person-years.<sup>20-23</sup> Additionally, atrial fibrillation in patients with end-stage renal disease is associated with increased mortality and a two- to three-fold increase in risk of stroke compared with general populations,<sup>20</sup> corresponding to an incidence of 60 to 150 per 1.000 person-years.<sup>24-26</sup>

Presence of end-stage renal disease is associated with increased risk of bleeding due to impairment of platelet function and possible abnormal platelet-endothelial interaction.<sup>27, 28</sup> Of note, levels of circulating coagulation factors remain normal or elevated, and no prolongation of prothrombin or partial thromboplastin times have been observed.<sup>29</sup> Additionally, vitamin K antagonism i.e. warfarin may accelerate vascular calcification through an inhibition of matrix Gla- ( $\gamma$ -carboxyglutamate) protein regulation of bone morphogenic protein-2 and -4.<sup>30, 31</sup> Although rare, warfarin may also be associated with induction of ectopic vascular calcification and possibly calciphylaxis / uremic calcific arteriopathy characterized by dermal ulceration and necrosis with medial calcification and intimal proliferation of small vessels.<sup>32</sup> As such, uremia may moderate benefit of treatment with oral anticoagulation in patients with end-stage renal disease and atrial fibrillation;<sup>24, 26</sup> the issue however remains unresolved, and the efficacy and safety of oral anticoagulation i.e. warfarin in patients with end-stage renal disease and atrial fibrillation has remained untested in prospective studies.<sup>33, 34</sup>

A number of retrospective studies have evaluated the benefit and harm of oral anticoagulation in dialysis-treated patients with end-stage renal disease; results however remain divergent.<sup>20, 24, 25, 33, 35-41</sup> Specifically, observational cohorts comparing benefit of oral anticoagulation in end-stage renal disease and atrial fibrillation have reported treatment with warfarin to be associated with reduced risk of stroke,<sup>24, 35, 38, 41</sup> increased risk of stroke,<sup>33, 39, 40</sup> and

**DAN-WAR-D** – Danish Warfarin-Dialysis Study (Research protocol, version 1.26, 17/2-23, EUDRACT 2018-000484-86, CTIS 2022-502500-75-00)

neither decreased nor increased risk of stroke.<sup>22, 25, 36</sup> Similarly, warfarin may also be associated with increase in risk of bleeding,<sup>24, 25, 36, 37</sup> or no increase in risk of bleeding.<sup>35, 39, 41</sup> Unsurprisingly, a recent meta-review comprising >50.000 patients with end-stage renal disease observed no definite warfarin-associated increase or decrease in risk of stroke, and no definite warfarin-associated increase or decrease in risk of major bleeding.<sup>42</sup>

Consequent to the discrepant results, guidelines pertaining to anticoagulation in end-stage renal disease remain ambiguous with regard to the benefit of treatment. As such, while the 2014 American College of Cardiology/American Heart Association guideline extends recommendations of treatment with oral anticoagulation to include patients with end-stage renal disease,<sup>14</sup> the Kidney Disease Improving Global Outcomes (KDIGO) guidelines caution that, given the lack of randomized clinical trials, the risk-to-benefit ratio of routine anticoagulation for primary or secondary prevention of stroke in end-stage renal disease remains uncertain.<sup>43</sup> No definitive recommendation is advocated with regard to oral anticoagulation in the 2016 European Society of Cardiology guideline and 2018 European Heart Rhythm Association guideline, both merely advocating further research.<sup>15, 16</sup>

Considering the deficient evidence pertaining to the safety and efficacy of oral anticoagulation in patients with end-stage renal disease and atrial fibrillation, equipoise currently exists among nephrologists regarding the benefit-to-risk ratio of anticoagulation for stroke risk reduction in the dialysis population.<sup>44</sup> Unsurprisingly, prescription of oral anticoagulation i.e. warfarin in patients with end-stage renal disease diagnosed with new-onset atrial fibrillation remains inconsistent, with <50% of patients initiating oral anticoagulation currently.<sup>25, 36, 38</sup> As such, a prospective evaluation of the safety and efficacy of oral anticoagulation i.e. warfarin in patients with end-stage renal disease and atrial fibrillation is warranted,<sup>45</sup> as results would expectantly provide essential insights with unequivocal implications for clinical practice.

### **Drug information: warfarin**

The coumarin anticoagulant, warfarin, is a racemate of two active isomers. Administration is oral, bioavailability is 79-100%, volume of distribution is 0.14l/kg, and 99% is albumin-bound. Warfarin is employed in the prevention and treatment of thromboembolic diseases including venous thrombosis, thromboembolism, pulmonary embolism, and

**DAN-WAR-D** – Danish Warfarin-Dialysis Study (Research protocol, version 1.26, 17/2-23, EUDRACT 2018-000484-86, CTIS 2022-502500-75-00)

for the prevention of ischemic stroke in patients with atrial fibrillation. Warfarin inhibits vitamin K reductase leading to depletion of the reduced form of vitamin K (vitamin KH<sub>2</sub>). Vitamin K is a cofactor for the carboxylation of glutamate residues on the N-terminal regions of vitamin K-dependent proteins; as such the depletion of vitamin KH<sub>2</sub> limits gamma-carboxylation and subsequent activation of the vitamin K-dependent coagulant proteins effects inhibited synthesis of the vitamin K-dependent coagulation factors II, VII, IX, and X, and the anticoagulant proteins C and S. Reduced availability of the vitamin K-dependent coagulation factors II, VII, and X results in decreases in prothrombin and thrombin levels leading to decreased clot thrombogenicity.

Elimination of warfarin is predominantly by hepatic metabolism, and renal clearance is limited. Metabolites are however principally excreted into the urine, and to a lesser extent into the bile. Warfarin is metabolized by stereo- and regio-selectively by hepatic microsomal enzymes including cytochrome P450, CYP1A1, 1A2, and 3A4 to yield hydroxylated metabolites. The biological half-life is 20-60 hours, and steady-state is usually realized within 2 days; however, therapeutic effects are delayed >48 hours as circulating coagulations factors remain unaffected by the drug. The effects of warfarin may be reversed with phytonadione (vitamin K<sub>1</sub>), fresh frozen plasma, or prothrombin complex concentrate.

Warfarin treatment is guided by monitoring of the prothrombin time as expressed in the international normalized ratio. The target international normalized ratio is dependent on the clinical situation; an international normalized ratio of 2-3 is indicated for prevention of ischemic stroke in patients with atrial fibrillation. Due to the common interaction of warfarin with nutrients and other medications, continuous adjustment of the warfarin dose in accordance with the international normalized ratio is indicated. Guidelines pertaining to warfarin therapy advocate initiation of treatment employing a daily dose of 5mg with dose-adjustment in accordance with a measured international normalized ratio on day 5,<sup>46-48</sup> with indefinite monitoring of international normalized ratios and adjustment of therapy.

The major complication associated with warfarin is bleeding. Generally, the risk of major bleeding is about 2 to 3% per year;<sup>49, 50</sup> however, risk of bleeding is individual and greatest during the first weeks following warfarin initiation, and during periods of illness.<sup>51, 52</sup> As such, in patients tolerating treatment for > 6 months, the risk of bleeding

**DAN-WAR-D** – Danish Warfarin-Dialysis Study (Research protocol, version 1.26, 17/2-23, EUDRACT 2018-000484-86, CTIS 2022-502500-75-00)

decreases to < 1% per year,<sup>52</sup> and although the risk of major bleeding increases with rising international normalized ratios (particularly with international normalized ratios > 4), the 30-day risk of bleeding associated with a singular dysregulated international normalized ratio remains low <1%.<sup>53-55</sup> Other complications associated with warfarin including skin necrosis, hair loss, and calciphylaxis / calcific uremic arteriopathy remain rare.

## Aims and objectives

Overall, data pertaining to the tolerability, safety, and benefit of initiating anticoagulation for stroke risk reduction in patients with end-stage renal disease and atrial fibrillation remains conflicting and insufficient. Patients on dialysis continue to be routinely excluded from randomized controlled trials, and evidence from observational studies is plausibly biased. The **main objective** of the following parallel-group open randomized clinical trial presents a nationwide study aimed at investigating the benefit, tolerability, and safety of initiating warfarin versus no treatment in patients with atrial fibrillation on dialysis. The **anticipated results** from this project will provide conclusive evidence as to the appropriateness of initiating oral anticoagulation for stroke risk reduction in dialysis populations with atrial fibrillation with direct effects on clinical management and international guidelines pertaining to these patients.

Based on the anticipated results, the study is initiated based on a **general hypothesis** theorizing that initiation of anticoagulation in dialysis-treated patients with end-stage renal disease and atrial fibrillation is associated with stroke risk reduction and benefit on survival. Explicitly, the **specific hypothesis** theorizes that anticoagulation based on warfarin dosing targeting an international normalized ratio of 2-3 is associated with net benefit as compared to no treatment in dialysis-treated patients with end-stage renal disease and atrial fibrillation.

## Methods

### Study participants

Prevalence and incidence of dialysis-treated patients with end-stage renal disease is approximately 2.500 and 600-700 per year in Denmark, respectively.<sup>56</sup> Incidence of de novo atrial fibrillation in dialysis-treated end-stage renal disease is approximately 150-300 per year (unpublished data based on data in the Danish National Patient Registry

**DAN-WAR-D** – Danish Warfarin-Dialysis Study (Research protocol, version 1.26, 17/2-23, EUDRACT 2018-000484-86, CTIS 2022-502500-75-00)

2000-2012), and rising. Dialysis-treated patients with end-stage renal disease diagnosed with atrial fibrillation identified in the clinical setting will be recruited from all 14 existing dialysis centers (including satellites) in Denmark (overview provided as Supplemental Table S2).

Participants will be recruited in accordance with the listed inclusion and exclusion criteria.

### **Inclusion criteria**

1. Patients  $\geq 18$  years on chronic dialysis due to end-stage renal disease.
2. Any non-valvular paroxysmal, persistent or permanent atrial fibrillation or flutter documented by an electrocardiogram, episode of  $\geq 30$  seconds on Holter monitor, or episode of  $\geq 6$  minutes on event recorder or any other recording device
3. Competence to understand the study rationale, including potential risks and benefits associated with treatment, necessary for written informed consent.

### **Exclusion criteria**

1. CHA<sub>2</sub>DS<sub>2</sub>-VASc Score  $\leq 1$
2. Other indications for oral anticoagulation treatment (pulmonary embolism < 6months, deep vein thrombosis <3months, mechanical heart valve prosthesis) - irrespective of whether treatment is implemented
3. Ongoing dual antiplatelet treatment
4. Malignancy (with exception of non-melanoma skin cancer) with recent < 1 year, ongoing, or planned curative, or palliative chemo-, radiation-, and/or scheduled surgical therapy
5. Endoscopy with gastrointestinal ulcer <1 month
6. Esophageal varices
7. Autoimmune or genetic coagulation disorders
8. Congenital alactasia, Lapp Lactase deficiency or glucose-galactose malabsorption
9. Pending spinal tap
10. Cerebrovascular malformations
11. Arterial aneurisms



**DAN-WAR-D** – Danish Warfarin-Dialysis Study (Research protocol, version 1.26, 17/2-23, EUDRACT 2018-000484-86, CTIS 2022-502500-75-00)

12. Ulcers or wounds (Wagner grad >1)
13. Bacterial endocarditis < 3 months
14. Active bleeding contraindicating anticoagulation
15. Any non-elective and/or non-ambulant surgery <7 days
16. Cerebral hemorrhage <4 weeks
17. Thrombocytopenia (platelet count <100 × 10<sup>9</sup>/L) <30 days.
18. Severe liver insufficiency (spontaneous international normalized ratio >1.5) <30 days.
19. Known intolerance to warfarin
20. Use of hypericum perforatum / St. John's Wort
21. Uncontrolled hypertension (repeat blood pressure >180/110mmhg) < 30 days
22. Uncontrolled hyperthyroidism (thyroid-stimulating hormone <0.1μIU/mL) <30 days
23. Pregnancy or lactation
24. Participation in other ongoing intervention trials adjudged to influence study outcomes

### **Pregnancy and contraception**

A woman is considered of childbearing potential i.e. fertile, following menarche and until becoming post-menopausal unless permanently sterile. Permanent sterilization methods include hysterectomy, bilateral salpingectomy and bilateral oophorectomy. A postmenopausal state is defined as no menses for 12 months without an alternative medical cause. A high follicle stimulating hormone level in the postmenopausal range may be used to confirm a post-menopausal state in women not using hormonal contraception or hormonal replacement therapy. However in the absence of 12 months of amenorrhea, a single measurement is considered insufficient.

All female study participants of childbearing potential will be required to use highly effective birth control methods throughout participation in the study until the end of systemic exposure. The end of systemic exposure is defined as the time point where the warfarin, including active or major metabolites, has decreased to a concentration no longer considered relevant for human teratogenicity / fetotoxicity i.e. a period extended 30 days beyond 5 half-lives (>6 weeks) to ensure against genotoxicity. Highly effective birth control methods are defined as methods able to achieve a failure rate of less than 1% per year when used consistently and correctly are considered as highly

**DAN-WAR-D** – Danish Warfarin-Dialysis Study (Research protocol, version 1.26, 17/2-23, EUDRACT 2018-000484-86, CTIS 2022-502500-75-00)

effective birth control methods in accordance with the definition provided in the Heads of Medicine Agencies guideline.

Highly effective birth control methods:

1. Combined estrogen and progestogen hormonal contraception (oral, intravaginal, or transdermal)
2. Progestogen-only hormonal contraception (oral, injectable, or implantable)
3. Intrauterine device
4. Intrauterine hormone-releasing system
5. Bilateral tubal occlusion
6. Vasectomized partner
7. Sexual abstinence

A negative highly sensitive pregnancy test will be required for all women of childbearing potential at inclusion, with scheduled monthly pregnancy testing throughout the study period.

### **Randomization of allocated treatment**

Dialysis-treated patients with end-stage renal disease with diagnosis of paroxysmal, persistent, or permanent atrial fibrillation will be randomly allocated to either treatment with warfarin or no treatment. Hence, patients already receiving anticoagulation will be randomized to continue or discontinue their treatment. Participants will be assigned to either warfarin or no treatment with a 1:1 allocation as per a computer-generated randomization schedule based in REDCap stratified by center using permuted blocks of random sizes. Block size and allocation ratio will remain undisclosed to ensure concealment. All study participants will be allocated to receive treatment in accordance with the randomization for the full duration of the trial i.e. at a minimum one year following randomization. Allocated warfarin treatment will be prescribed by the recruiting nephrology departments. Patients will be considered enrolled in the study from the date of randomization.

A schematic overview of study design and randomization of allocated treatment is provided in **Figure 1**.

DAN-WAR-D – Danish Warfarin-Dialysis Study (Research protocol, version 1.26, 17/2-23, EUDRACT 2018-000484-86, CTIS 2022-502500-75-00)

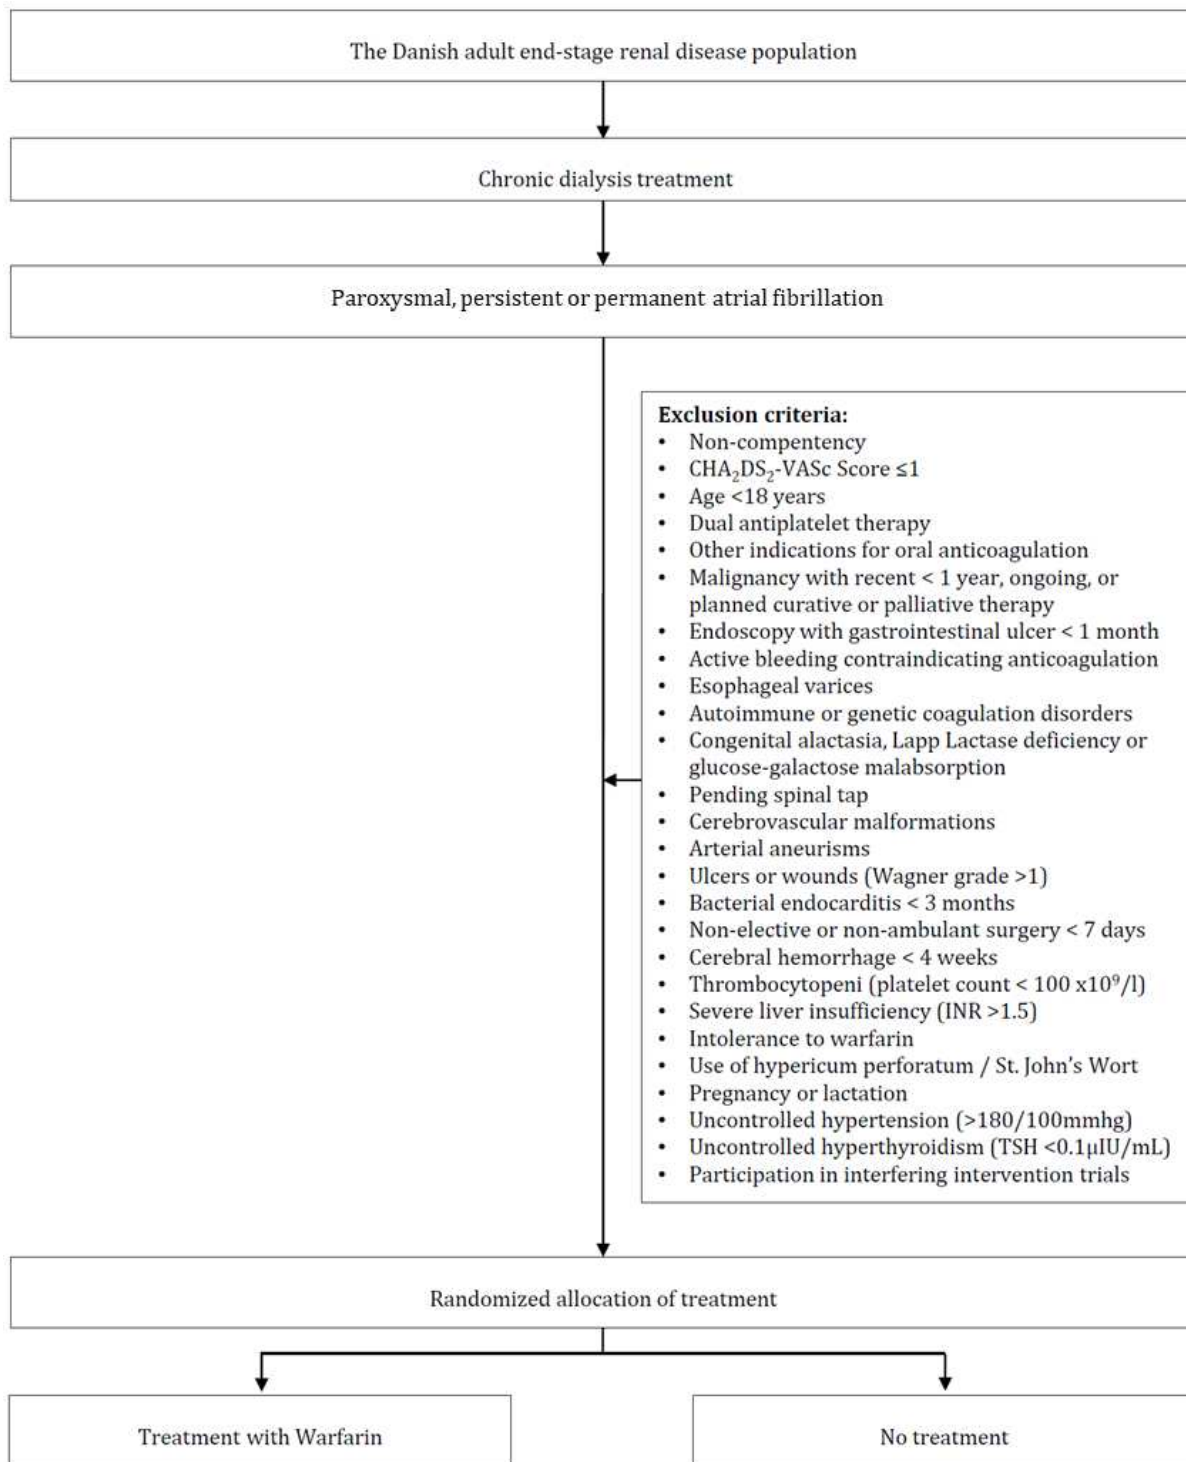

**DAN-WAR-D** – Danish Warfarin-Dialysis Study (Research protocol, version 1.26, 17/2-23, EUDRACT 2018-000484-86, CTIS 2022-502500-75-00)

### **Figure 1 Study design and allocation of randomized treatment**

Randomization of patients with end-stage renal disease on chronic dialysis with atrial fibrillation to either treatment with warfarin or no treatment.

Post-randomization discontinuation of the allocated treatment is indicated if oral anticoagulation is required due to other indications, if considerable and repeated side effects arise, or in any case where the attending physician or patient assesses that the allocated treatment should be discontinued pending deliberation of treatment appropriateness with the Study nucleus.

### **Data sources**

The study is planned as a multicentre, randomized, open label, parallel group study. Patients will be allocated to treatment with warfarin or no treatment. As indicated below, the study is planned to include 718 patients. The steering committee may review recruitment rate and overall event rate, blinded by treatment, and increase sample size until 1.436 patients pending approval of a substantial amendment of the protocol to relevant authorities. Study follow-up including study outcomes will be recorded in a central database by on-site investigators using the REDCap webapplication, with qualitative monitoring of registration based on data from national health care registers; importantly, dialysis-treated patients with end-stage renal disease require frequent and systematic follow-up in nephrology centres regardless of study inclusion. As such, any additional systematic follow-up solely directed by the trial is minimized. Overall, information including baseline data, data pertaining to trial adherence, and data pertaining to outcomes during follow-up will be recorded via registration in the REDCap webapplication by on-site investigators in the context of ambulant dialysis control and quarterly reviews, with qualitative monitoring of data registration based on data extraction from national health care registers.

### **Monitoring via the Danish Health Care Registers**

A qualitative assessment of study data recorded by on-site investigators will be performed based on data retrieved from national administrative and clinical databases. Numerous comprehensive and validated national registers exist in Denmark.<sup>57-59</sup> Information regarding hospitalization, medication, morbidity and mortality is recorded in national databases (i.e. the Danish National Patient Register, the Danish Registry of Medicinal Product Statistics, the Civil

**DAN-WAR-D** – Danish Warfarin-Dialysis Study (Research protocol, version 1.26, 17/2-23, EUDRACT 2018-000484-86, CTIS 2022-502500-75-00)

Registration System, the National Laboratory database) under a unique individual central person register (CPR) number permitting cross-referencing of data between registers. Data procurement will be effectuated through the research service afforded under the Danish Health Authority permitting cross-referencing of data regarding morbidity, mortality, prescriptions, socioeconomic status, hospitalization and treatment. Information concerning mortality will be obtained from the Civil Registration System and information regarding cause of death from the National Register of Causes of deaths. Prescription data, including dosage and treatment changes, will be acquired from the national prescription database permitting assessment of compliance. Data relating international normalized ratios will be acquired from the national laboratory database permitting qualitative evaluation of the time in therapeutic range. Specific illness will be determined through the Danish National Patient Register, the Danish Stroke Register, and the Danish National Register on Regular Dialysis and Transplantation.<sup>60</sup>

### **Study data**

Civil registration number, patient age, gender, primary renal disease, dialysis modality and access type, dialysis longevity, prior renal transplantations, existing cardiovascular comorbidity (ischemic heart disease, prior revascularization, heart failure and left ventricular ejection fraction, hypertension, stroke, TCI, thromboembolic disease, peripheral vascular disease, prior lower extremity amputation) and non-cardiovascular comorbidity (hypo-/hyperthyroidism, chronic obstructive pulmonary disease, diabetes mellitus, liver disease, prior gastrointestinal bleed, prior malignancy, prior psychiatric disease), smoking status and alcohol consumption, medication, laboratory measurements relating the most recent hemoglobin level, platelet count, albumin level, phosphate level, ionized-calcium level, parathyroid hormone level, c-reactive protein level, blood urea nitrogen, HbA1c and creatinine level, and allocated treatment will be recorded by onsite investigators using the REDCap webapplication at the time of randomization. Baseline and follow-up data will be procured based on registrations using the REDCap webapplication in a central database by on-site investigators; the quality of registration will additionally be monitored based on data retrieved from national health care registers. Adherence to the allocated treatment will be ascertained based on time in therapeutic range as defined by international normalized ratios relating time in therapeutic range (%) and patient reported non-adherence recorded by on-site investigators; registration by on-site investigators will be completed within the context of ambulant dialysis control and retrospectively within the context of quarterly reviews. Patients

**DAN-WAR-D** – Danish Warfarin-Dialysis Study (Research protocol, version 1.26, 17/2-23, EUDRACT 2018-000484-86, CTIS 2022-502500-75-00)

will be considered enrolled in the study following randomization, and all patients enrolled will be accounted for in the study results.

### **Follow-up**

Monitoring and dosing of warfarin therapy will be conducted in accordance with national guidelines pertaining to anticoagulation therapy with warfarin as defined by the Danish Society of Cardiology ([http://nbv.cardio.dk/ak#afs14\\_1](http://nbv.cardio.dk/ak#afs14_1)) and the Danish Health Authority (Supplementary Figure S1). Monitoring of treatment and warfarin dosing will be performed within the context of ambulant dialysis controls in accordance with common practice. Patients with end-stage renal disease are continuously evaluated by nurses and physicians at nephrology departments while undergoing ambulant dialysis treatment with pre-scheduled non-trial related clinical and laboratory assessment in the majority of patients performed on a weekly basis. Patient assessment and monitoring will additionally be performed within the context of the study at a minimum by on-site investigators at scheduled monthly, quarterly, and annual assessments as defined in the study schedule of appointments (Supplementary Table S4). However, on-site investigators may schedule additional ambulatory control in patients where indicated. As defined in the national guidelines, warfarin therapy necessitates continuous evaluation and documentation of treatment quality, as defined by a time in therapeutic range  $\geq 70\%$ , i.e. an international normalized ratio of 2-3 more than 70% of the time as defined in national and international guidelines. Adherence and compliance will be monitored by on-site investigators based on recorded measurements relating therapeutic time in range (%) and patient-reported adherence to the allocated treatment at the scheduled quarterly ambulant controls; non-adherence will be defined as an time in therapeutic range  $< 70\%$  or patient-reported non-adherence. On-site investigators will at minimum register the latest international normalized ratio, the patient-reported adherence to allocated treatment, and data pertaining to outcomes of patients at scheduled quarterly reviews via the REDCap webapplication in accordance with the schedule of appointment, with supplementary monitoring of the latest international normalized ratios at monthly intervals.

Additionally, the study nucleus will perform annual qualitative assessment of registration practices based on data retrieval from national health care registers via the research service afforded under the Danish Health Authority (<https://sundhedsdatastyrelsen.dk/da/forskertjeneste>). The Danish Health Authority is a state-owned entity in

**DAN-WAR-D** – Danish Warfarin-Dialysis Study (Research protocol, version 1.26, 17/2-23, EUDRACT 2018-000484-86, CTIS 2022-502500-75-00)

Denmark sorting under the Ministry of Health. Professors Christian Torp-Pedersen and Gunnar Gislason in collaboration with the coordinating investigator Nicholas Carlson will share responsibility for maintaining an updated database including patient identification and treatment allocation permitting monitoring of recruitment and outcomes by the Trial Steering Committee.

### **Study end**

Study end will be defined as one year after ultimate randomization. A preplanned analysis of outcome by allocated treatment is proposed at study end. Patients will be informed of study end by the local primary investigator within the context of a scheduled end of treatment control. All individuals will be followed a minimum of one year; however patients randomized early in the trial will be followed for the full four year duration of the trial. Following end of treatment, patients will be followed for an additional 6 weeks to ensure registration of delayed treatment effects. Patients may opt to discontinue the allocated treatment for any reason, and on-site physicians may opt to discontinue allocated treatment due to clinical necessity permitting deliberation of treatment appropriateness in the study nucleus. All patients discontinuing treatment will be assessed within the context of an end of treatment control with registration of reasons for discontinuation of treatment. As patients will be receiving warfarin therapy in accordance with the approved indication and the summary of product characteristics, no formal instructions on patient management beyond existing guidelines are proposed. Of note, the decision to continue or discontinue treatment with warfarin beyond study completion will be at the discretion of the onsite investigators.

### **Study outcomes**

The primary efficacy outcome of any transient ischemic attack, ischemic or unspecified stroke or death due to a transient ischemic attack, ischemic or unspecified stroke will be compared between patients allocated warfarin and no treatment. The primary safety outcome will be major bleeding defined in accordance with the International Society on Thrombosis and Hemostasis definition pertaining to major bleeding in non-surgical patients, i.e. major intracranial, intraspinal, intraocular, retroperitoneal, intraarticular, pericardial, intramuscular with compartment syndrome, or gastrointestinal bleeding.<sup>61</sup>

**DAN-WAR-D** – Danish Warfarin-Dialysis Study (Research protocol, version 1.26, 17/2-23, EUDRACT 2018-000484-86, CTIS 2022-502500-75-00)

Secondary outcomes will include; non-fatal and fatal ischemic or unspecified stroke, non-fatal and fatal stroke, non-fatal and fatal haemorrhagic stroke, non-fatal and fatal ischemic or hemorrhagic stroke, all-cause mortality, and the combination of any non-fatal stroke and all-cause mortality, and the combination of any non-fatal stroke, any non-fatal major bleeding, and all-cause mortality as defined in table 2. Tertiary outcomes will include discontinuation of the allocated randomized therapy, calciphylaxis, arteriovenous fistula thrombosis, fatal or non-fatal acute myocardial infarction, hospitalization due to left-sided heart failure, peripheral artery disease, arteriovenous fistula thrombosis, osteoporotic fractures, alopecia, and dermal necrosis. Additionally, the time in therapeutic range adjust by international normalized ratios will be evaluated amongst patients treated with warfarin.

All study outcomes will be at a minimum be registered by onsite investigators in the study database using the REDCap webapplication within the context of quarterly reviews and ambulant dialysis control.

To ensure accurate registration of study outcomes by onsite investigators, efficacy and safety outcomes will additionally be monitored qualitatively based on administrative billing codes recorded in the Danish National Patient Register or the Danish National Register of Causes of Death. End of trial will be defined as 6 weeks following end of treatment. The working definition of ischemic stroke is based on pre-existing validation studies pertaining to the employment of administrative billing codes for identification of ischemic stroke in the Danish National Patient Register.<sup>62, 63</sup> Administrative billing codes pertaining to the defined efficacy and safety outcomes are presented below in **Table 1**.

**Table 1 Administrative billing codes pertaining to the defined primary efficacy and safety outcomes**

|                                                                                   |                                                                                                                                                                                                                                    |
|-----------------------------------------------------------------------------------|------------------------------------------------------------------------------------------------------------------------------------------------------------------------------------------------------------------------------------|
| <b>Primary efficacy outcome</b>                                                   |                                                                                                                                                                                                                                    |
| Any transient ischemic attack, fatal and non-fatal ischaemic or unspecific stroke | ICD-10: DG45 or DI63-64                                                                                                                                                                                                            |
| <b>Primary safety outcome</b>                                                     |                                                                                                                                                                                                                                    |
| Fatal or non-fatal major bleeding                                                 | ICD-10: DI60-62, DK250, DK252, DK254, DK256, DK260, DK262, DK264, DK266, DK270, DK272, DK274, DK276, DK280, DK282, DK284, DK286, DK290, DK298A, DK920-922, DJ942, DN02, DR319A, DG951A, DD500, DD62, DS368D, DS064-66, and/or DR04 |



**DAN-WAR-D** – Danish Warfarin-Dialysis Study (Research protocol, version 1.26, 17/2-23, EUDRACT 2018-000484-86, CTIS 2022-502500-75-00)

Qualitative monitoring of registration of secondary and tertiary outcomes will also be performed based on administrative billing codes recorded in the Danish National Patient Register or the Danish National Register of Causes of Death. Administrative billing codes pertaining to secondary and tertiary outcomes are provided below in **Table 2** and **Table 3**.

**Table 2 Administrative billing codes pertaining to the defined secondary outcomes**

| <b>Secondary outcomes</b>                                                                  |                                                                                                                                                                                                |
|--------------------------------------------------------------------------------------------|------------------------------------------------------------------------------------------------------------------------------------------------------------------------------------------------|
| Fatal or non-fatal ischemic or unspecified stroke                                          | ICD-10: DI63-64                                                                                                                                                                                |
| Fatal or non-fatal ischemic stroke                                                         | ICD-10: DI63                                                                                                                                                                                   |
| Fatal or non-fatal haemorrhagic stroke                                                     | ICD-10: DI60-62                                                                                                                                                                                |
| Fatal or non-fatal ischemic or haemorrhagic stroke                                         | ICD-10: DI60-64                                                                                                                                                                                |
| All-cause mortality                                                                        | Registration of death in the civil registration system                                                                                                                                         |
| Combination of any non-fatal stroke and all-cause mortality                                | ICD-10: DI60-64 or registration of death in the civil registration system                                                                                                                      |
| Combination of any non-fatal stroke, any non-fatal major bleeding, and all-cause mortality | ICD-10: DI61-64 or registration of death in the civil registration system or ICD-10: DI60, DK250-253, DK260-263, DK270-273, DK290, DK920-922, DK298A, DN02, DR319A, DG0951A, DD62, and/or DR04 |

**Table 3 Administrative billing codes pertaining to the defined tertiary outcomes**

| <b>Tertiary outcomes</b>                                                                                                   |                                                                                            |
|----------------------------------------------------------------------------------------------------------------------------|--------------------------------------------------------------------------------------------|
| Discontinuation of allocated randomized therapy                                                                            | Non-redemption of prescriptions in the The Danish Registry of Medicinal Product Statistics |
| Calciphylaxis / calcific uremic arteriolopathy                                                                             | ICD-10: DL942B                                                                             |
| Fatal or non-fatal acute myocardial infarction                                                                             | ICD-10: DI21                                                                               |
| Hospitalization due to left-sided heart failure                                                                            | ICD-10: DI50                                                                               |
| Peripheral artery disease                                                                                                  | ICD-10: DI70 and DI739                                                                     |
| Thrombosis of arteriovenous fistula                                                                                        | ICD-10: DI744 or KPBU                                                                      |
| Osteoporotic fractures including low energy fractures of the proximal femur, distal radius, humerus, pelvis, and vertebrae | ICD-10: DM80, DS72, DS32, DS422-4, DS525, and DS22                                         |

**DAN-WAR-D** – Danish Warfarin-Dialysis Study (Research protocol, version 1.26, 17/2-23, EUDRACT 2018-000484-86, CTIS 2022-502500-75-00)

## Statistical analyses

Treatment with warfarin will be compared with no treatment for all outcomes. A principal analysis will be performed based on an intention-to-treat model comparing cumulative risk of ischemic stroke in patients with end-stage renal disease and incident atrial fibrillation allocated warfarin treatment and no treatment, respectively. Gray's test will be employed to compare the weighted averages of the subdistribution hazards across allocated treatments for the event of interest. The null hypothesis is that warfarin is associated with equivalent or increased risk of ischemic stroke compared with no treatment. The alternative hypothesis that warfarin is associated with benefit on risk of ischemic or hemorrhagic stroke compared with no treatment.

Secondary analyses will evaluate whether warfarin is associated with benefit on risk of ischemic stroke greater than a specified superiority margin  $\delta \leq 0.68$ . The superiority margin is based on the risk reduction observed in existing placebo-controlled warfarin trials in patients with preserved renal function.<sup>64</sup> The defined superiority margin preserves 50% of the benefits of oral anticoagulating treatment compared to control therapy based on the upper boundary of the 95% confidence interval in patients with preserved renal function. Although the risk of major bleeding is increased in end-stage renal disease, we also hypothesize that warfarin is not associated with an increased risk of major bleeding compared with no treatment greater than the safety margin  $\delta = 1.23$  corresponding to a harm-to-benefit ratio of 2.

A number of tertiary analyses will be performed employing multiple Cox regression models stratified according to gender, age, sex, prior anticoagulation treatment, comorbidity including stratification on prior stroke (ischemic or unspecified, or hemorrhagic), prior bleeding, atrial fibrillation heritage (incident or prevalent), dialysis center, and dialysis modality. Furthermore, time-to-event analyses based on as-treated time-updated models using Cox proportional hazards model permitting assessment of for time-dependent assessment of treatment including time in therapeutic range, dialysis modality, and risk covariates, and intention-to-treat analyses with censoring of patients deviating from the allocated randomized treatment will also be performed. For all analyses, significance will be determined by a p-value  $\leq 0.05$ . Determination of superiority will be based on the primary efficacy endpoint.

DAN-WAR-D – Danish Warfarin-Dialysis Study (Research protocol, version 1.26, 17/2-23, EUDRACT 2018-000484-86, CTIS 2022-502500-75-00)

## Pilot study

In a retrospective pilot study, patients with end-stage renal disease and incident atrial fibrillation between 2002 and 2012 were identified; incidence of new-onset atrial fibrillation increased continuously from 4.0 (95% CI 3.8 - 4.2) per 100 person years to 7.8 (95% CI 6.8 - 9.0) per 100 person years from 2002 to 2012.<sup>65</sup> Based on a multiple cause-specific Cox regression model, standardized one-year risks of stroke and major bleeding were calculated using the g-formula for warfarin and acetylsalicylic acid.<sup>66</sup> Absolute one-year risk of stroke was 1.7 (95% CI 0.1 - 8.9) per 100, and 6.1 (95% CI 4.2 - 8.0) per 100 in patients treated with warfarin and no treatment, respectively, and absolute one-year risk of major bleeding was 9.2 (95% CI 0.1 - 20.8) per 100, and 8.1 (95% CI 6.0 - 10.0) per 100, respectively. Standardized absolute one-year risks of stroke and major bleeding are illustrated in **Figures 2a** and **2b**. Benefit-to-harm ratios comparing numbers needed-to-treat and -harm for stroke and major bleeding, respectively are illustrated in **Figure 3**.

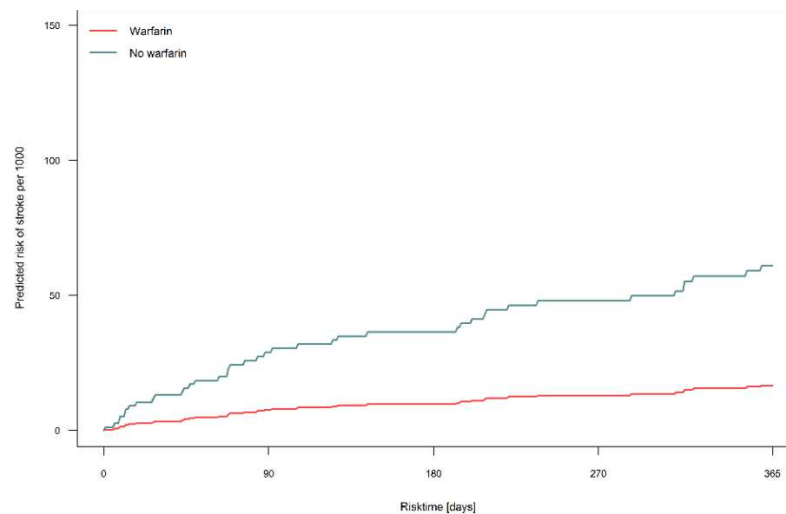

**Figure 2a One-year risk of stroke**

Predicted one-year risk of stroke in Danish patients with end-stage renal disease based on g-estimation modelled on cause-specific multiple cox regression

DAN-WAR-D – Danish Warfarin-Dialysis Study (Research protocol, version 1.26, 17/2-23, EUDRACT 2018-000484-86, CTIS 2022-502500-75-00)

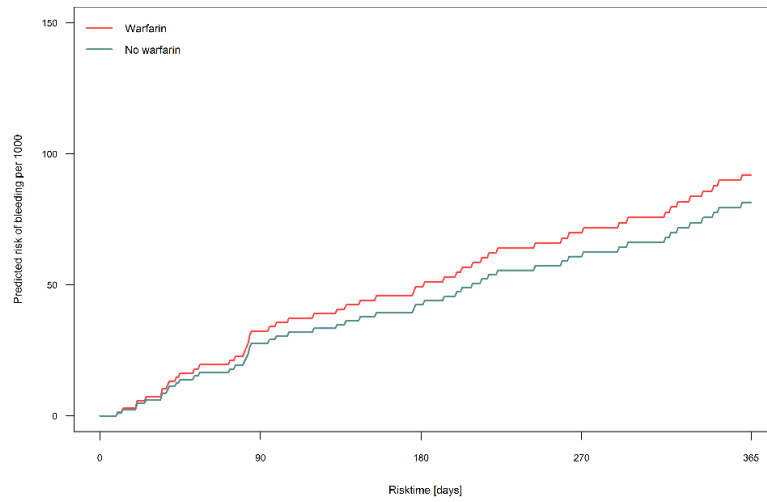

**Figure 2b One-year risk of major bleeding**

Predicted one-year risk of major bleeding in Danish patients with end-stage renal disease based on g-estimation of cause-specific multiple cox regression

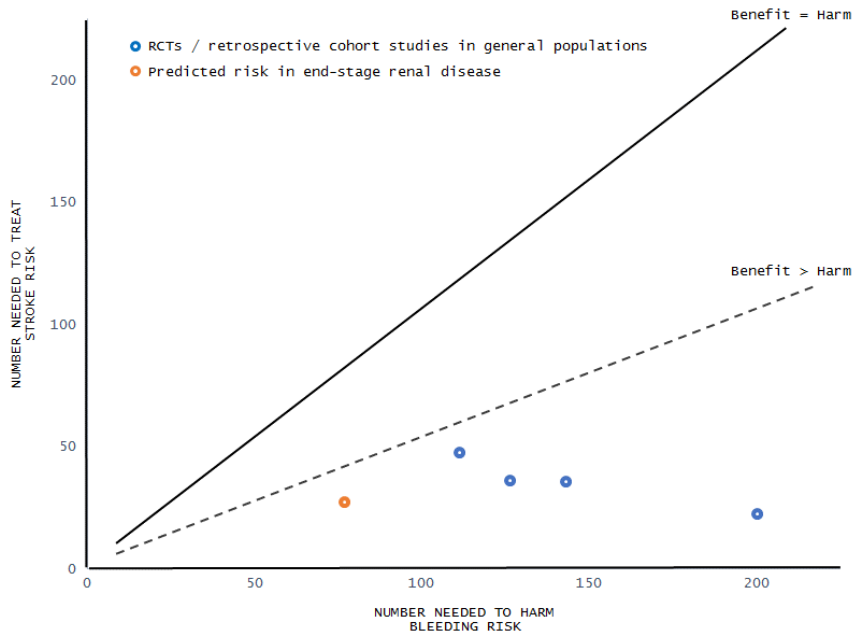

**Figure 3 Benefit-to-harm ratio**

Ratios of number needed-to-treat and -harm based on estimates of one year risk.<sup>67-71</sup> Non-dotted and dotted lines demarcate nondescript benefit-to-harm ratios of 1 and 2, respectively

DAN-WAR-D – Danish Warfarin-Dialysis Study (Research protocol, version 1.26, 17/2-23, EUDRACT 2018-000484-86, CTIS 2022-502500-75-00)

## Sample size calculation

Sample size was determined based on an assumption of an absence of a period effect. In the pilot study, warfarin was associated with an absolute risk reduction of >4% with regards to the primary outcome of ischemic or hemorrhagic stroke, corresponding to a risk ratio of 0.27 i.e. within the specified superiority margin  $\delta \leq 0.68$ . Within this framework, a sample size of  $n=299$  per group would be required to achieve a power of  $1-\beta = 0.80$  for a two-sided t-test with  $\alpha=0.05$ .

Due to the employment of validated national registers, drop-out rates due to loss to follow-up are expected to be minimal; nonetheless, to compensate for  $\leq 20\%$  drop-out, 359 patients will be included in each group. A plot depicting sample size calculation is provided in **Figure 4**.

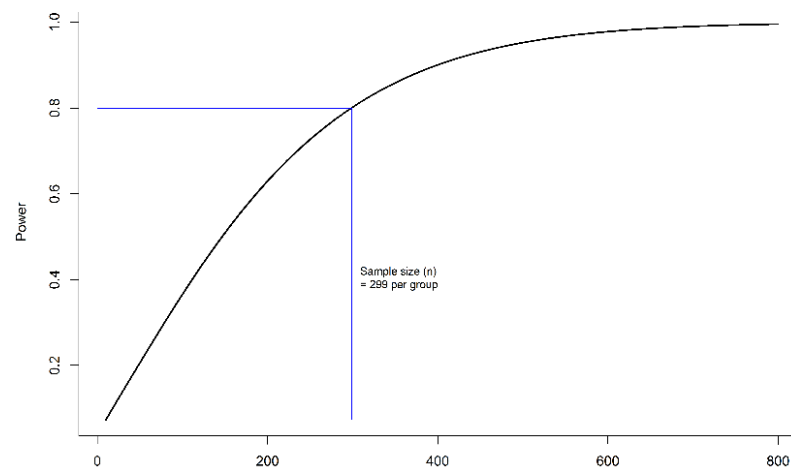

**Figure 4 Sample size calculation**

Based on predicted one-year absolute risk stroke, sample size i.e. the number of patients (n) in each group is depicted with corresponding power

## Ethics

### Data Safety Monitoring Committee

Prior to the initiation of the study, an independent Data Safety Monitoring Committee will be established. The Data Safety and Monitoring Committee will be formed with the aim of safeguarding the interests of enrolled patients,

**DAN-WAR-D** – Danish Warfarin-Dialysis Study (Research protocol, version 1.26, 17/2-23, EUDRACT 2018-000484-86, CTIS 2022-502500-75-00)

assessing the safety and efficacy of the allocated treatment during the trial, and monitoring the overall conduct of the trial. The Data Safety Monitoring Board will consist of three members; one expert in the field (Peter Clausen MD PhD Consultant, Department of Nephrology, Rigshospitalet), one biostatistician (Theis Lange, Associate Professor, Section of Biostatistics, Department of Public Health, University of Copenhagen), and one investigator with knowledge of trial conduct and methodology otherwise uninvolved in the study (Lars Valeur Køber, MD Professor DMSc, Department of Cardiology, Rigshospitalet). The responsibilities of the Data Safety and Monitoring Committee will include; interim and cumulative evaluation of study-related adverse events, interim and cumulative evaluation of treatment efficacy, evaluation and confirmation of data quality, completeness and timeliness, and evaluation of participant adherence to the study protocol.

### **Premature trial termination**

The Data Safety Monitoring Committee will at minimum review the safety endpoints every six months. The Data and Safety Monitoring Committee will have exclusive unblinded access to all data, and may recommend discontinuation of the study to the Trial Steering Committee based on reviews of safety events; however, no formalized interim analyses are preplanned. Throughout inclusion, interim analyses will be supplied in strict confidence for overview to the Data Safety Monitoring Committee. If results from the interim analyses provide sufficient evidence as to harm or benefit of the allocated treatments, the Data Safety Monitoring Committee will advise the Trial Steering Committee, thus enabling possible trial modifications or trial discontinuation. Premature trial termination will be communicated to study participants by on-site study investigators

### **Safety Management**

The Data Safety Monitoring Committee will adhere to the Data Safety Monitoring Committee Charter. Harm will be adjudged based on the predefined safety endpoints pertaining to fatal or non-fatal major bleeding. Safety monitoring will be accomplished by tracing of serious adverse events and reactions (SAEs and SARs), safety and efficacy endpoints and mortality in the continuously updated database registering adverse endpoints and outcomes recorded by on-site investigators via the REDCap webapplication in a central databank independent of data extraction from administrative health care registers. SAEs and SARs will be defined in accordance with the Danish Medicines Agency

**DAN-WAR-D** – Danish Warfarin-Dialysis Study (Research protocol, version 1.26, 17/2-23, EUDRACT 2018-000484-86, CTIS 2022-502500-75-00)

guideline as any serious event or reaction resulting in death, a life-threatening event, hospitalization or prolongation of a hospital stay, significant or lasting disability or work incapacity, or congenital anomalies or malformations. Retrospective registration of endpoints in the webapplication REDCap will at minimum be performed within the context of the monthly reviews. SAEs will be assessed for causality by the study investigators and reported to the study sponsor for further assessment of causality and expectedness within 24 hours when a SAR is suspected or when the SAE is not pre-specified in the following list of a priori anticipated SAEs. Registration of the anticipated list of SAEs will nonetheless at minimum require registration in the REDCap webapplication within the context of the scheduled monthly reviews.

Anticipated SAEs exempt from requirement of reporting within 24 hours for assessment of causality

- Any transient ischemic attack, or ischaemic or unspecified stroke
- Any myocardial infarction
- Any hospitalization due to left-sided heart failure
- Any diagnosis of peripheral artery disease
- Any hospitalization due to complications of arteriovenous fistula
- Any osteoporotic fractures
- Any hospitalization due to infection
- Any hospitalization due to dialysis catheter dysfunction
- Any hospitalization due to electrolyte imbalance
- Any hospitalization due to overhydration
- Any hospitalization due to hypotension
- Any hospitalization due to hypertension
- Any hospitalization due to diabetes including ketoacidosis
- Any hospitalization due to heart arrhythmia
- Any hospitalization due to muscle- or joint pains

**DAN-WAR-D** – Danish Warfarin-Dialysis Study (Research protocol, version 1.26, 17/2-23, EUDRACT 2018-000484-86, CTIS 2022-502500-75-00)

Treatment with warfarin will be implemented in accordance with common practice and the summary of product characteristics. Adverse effects of warfarin are well-known, the drug has been approved for medical use since the 1950's, and is on the World Health Organization list of essential medications. Adjudication of adverse events and reactions will be based on the chapter 4.8 in the product resume for Warfarin. In addition to the continuous monitoring of safety by the Data Safety Monitoring Committee, SAEs, SARs, safety and efficacy endpoints, and mortalities will be reported as summary results to the Danish Medicines agency annually throughout the duration of the study for assessment of safety. The Data Safety Monitoring Committee will evaluate safety based on SAEs, SARs, defined safety and efficacy endpoints including all-cause mortality.

### **Suspected Unexpected Serious Adverse Reactions**

All clinicians engaging with patients included in the trial will be required to report any serious and/or unexpected adverse events / reactions (SUSARs) potentially related to allocated treatment to the study investigators. The product resume for Warfarin will be employed as a reference document for assessment of the expected / unexpected nature of serious adverse events. In accordance with the legal requirements pertaining to SUSARs, all relevant information related to the life-threatening or lethal SUSARS will be reported to the Danish Medicines Agency by the study sponsor within 7 days of notification, and recorded in the dedicated safety databank. All non-life-threatening or non-lethal SUSARS will be reported to the Danish Medicines Agency by the study sponsor within 15 days. The product resume for Warfarin will be used as the reference document for evaluation and adjudication of adverse events and reactions including SUSARs. All SUSARs will be reported using the Danish Medicines Agency's e-form.

No pre-specified directives governing the management of treatment-specific side effects have been determined for the trial. As such, on-site physicians may discontinue the allocated treatment if major bleeding is observed or otherwise indicated.

### **Study implementation**

The proposed randomized clinical trial will be implemented in a nationwide collaboration between the Trial Steering Committee, Trial Management Committee, site-specific lead investigators, a data manager, and dialysis centers (including satellite units). The Trial Steering Committee represents an established research environment, and



**DAN-WAR-D** – Danish Warfarin-Dialysis Study (Research protocol, version 1.26, 17/2-23, EUDRACT 2018-000484-86, CTIS 2022-502500-75-00)

previous collaborations have yielded a number of internationally acclaimed epidemiological and clinical research projects. An overview of the Trial Steering Committee is provided in Supplementary Table S4. An existing collaboration with Statistics Denmark permits access to all necessary registers, and databases with relevant data from the national registers will be made available. Furthermore, a formalized partnership with the Biostatistics Department at Copenhagen University already exists. The study nucleus is wholly responsible for initiation of the proposed randomized clinical trial; no commercial sponsors are involved or planned for involvement in the study. Funding for wages to the principal investigator has been provided by The Danish Heart Foundation.

Study results are to be published in international peer-reviewed medical journals regardless of outcome, and study conclusions are to be publicised in press releases to national media.

The study is proposed to initiate September 1<sup>st</sup> 2019 and end one year after ultimate randomization.

### **Initiation and maintenance of warfarin treatment**

Introduction of warfarin treatment in patients with chronic kidney disease has been observed to be associated with marked increase in risk of adverse hemorrhagic events < 90 days;<sup>33, 52, 72</sup> plausibly due to initial overdosing.<sup>51</sup> Additionally, a 2016 Cochrane review comparing initial warfarin dose of 10mg versus 5mg observed no benefit in patients initiating with more aggressive dosing.<sup>73</sup> Existing guidelines advocate an initial dosing strategy of 5-10mg of warfarin daily in patients with renal competency. Of note, the British Committee for Standards in Hematology guideline pertaining to oral anticoagulation with warfarin specifically notes the possible appropriateness of a reduction in initial dose of warfarin < 5mg daily in elderly patients.<sup>46</sup> Similarly, the Danish Health Authority guideline governing anticoagulation with warfarin advocates dose reduction of 25-50% in patients > 80 years,<sup>47</sup> and the Danish Cardiology Society guideline also recommends tapering of dosing in elderly / frail patients.<sup>48</sup>

All patients allocated to oral anticoagulation will initiate treatment with warfarin in accordance with the existing Danish Health Authority guideline (Supplemental Figure S1). Monitoring and dosing will be performed by onsite investigators in accordance with common clinical practice. Patients allocated to oral anticoagulation will be required discontinuation of antiplatelet drugs (i.e. aspirin or Adenosine diphosphate receptor inhibitors) unless specifically contraindicated.

**DAN-WAR-D** – Danish Warfarin-Dialysis Study (Research protocol, version 1.26, 17/2-23, EUDRACT 2018-000484-86, CTIS 2022-502500-75-00)

Treatment with warfarin is non-expensive (<5 Danish kroner per day), and warfarin will be prescribed in accordance with common practice and the summary of product characteristics. Importantly, noncompliance and adherence remains substantial in patients with end-stage renal disease on dialysis; an estimated ½ to ⅓ of patients are noncompliant with regard to treatment.<sup>74</sup> Objectives predominating management of patients with end-stage renal disease include management of common complications including hypertension, hyperphosphatemia, and anemia while mitigating risks associated with prevalent comorbidities i.e. diabetes and coronary heart disease. Therapeutic goals are however unreachable without imparting a substantial pharmaceutical burden. Patients with end-stage renal disease remain amongst the group of patients with greatest daily pill burden. Reportedly, end-stage renal disease patients are prescribed ~20 medications, with a quarter of patients taking >25 pills daily.<sup>75</sup> Unsurprisingly, the significant pill burden is known to be closely associated with issues related to adherence and compliance.

The issue is particularly pertinent with regard to warfarin as bleeding risk is particularly pronounced in patients in the early phase of anticoagulant therapy, and unsurprisingly in patients with poor anticoagulation control.<sup>55, 76</sup> As such, risk of bleeding in patients with end-stage renal disease taking warfarin could quite plausibly be correlated with non-adherence and shifting compliance. Consequently, the study will investigate adherence and compliance as independent endpoints.

Warfarin will be provided free of charge to patients randomized to treatment in the study. Study medicine will be prepared and packaged by the hospital pharmacy in accordance with the rules governing Good Manufacturing Practices Annex 13 with appropriate labeling detailing the study identification number, the name of the study investigator, and the notification 'For clinical trial'. A labelling example is provided in the appendices (Supplementary Figure S2). In the event of death or discontinuation of anticoagulation treatment discontinuation, disposal of study medication will be completed without requirement of specific documentation by study investigators in accordance with common practice for prescription medication in general.

Study investigators will register treatment adherence / compliance and latest international normalized ratios at monthly intervals and scheduled quarterly safety reviews.

**DAN-WAR-D** – Danish Warfarin-Dialysis Study (Research protocol, version 1.26, 17/2-23, EUDRACT 2018-000484-86, CTIS 2022-502500-75-00)

## Research ethics approval

The trial is a multicenter parallel-group open randomized controlled trial which is conducted according to the Declaration of Helsinki. The protocol and the template informed consent forms, participant information and recruitment materials, and other documents – and any subsequent modifications – contained in the appendix have been approved by the Regional Committee on Health Research Ethics (Journal no.:H-18050839) and the Danish Medicines Agency (Case no. 2018101877) with respect to scientific content and compliance with applicable research regulations. The protocol has been registered with the European Clinical Trials database (EudraCT number 2018-000484-86), Clinical Trials Information System (CTIS ID 2022-502500-75-00) and clinicaltrials.gov (ID NCT03862859). No patients will be included until all relevant authorizations have been attained. The investigators have no conflicts of interest to report.

## Funding

The trial is an investigator-initiated study. The study is however supported by a research grant of 990.000 DDK from the Danish Heart Foundation covering preliminary database and project development. The research grant is administered by the research department at the Danish Heart Foundation. All participating investigators are independent of financial interest in the study results.

## Modifications to the protocol

Any modification of the protocol with potential impact on the conduct of the study, patient benefit or harm, including changes of study objectives, study design, patient population, sample sizes, study procedures, or significant administrative aspects will require a formal amendment to the protocol. Such amendment will be agreed upon by Trial Steering Committee, and be submitted for approval by the Regional Committee on Health Research Ethics prior to implementation in accordance with existing regulations. Administrative changes of the protocol defined as minor corrections and/or clarifications that have no effect on the way the conduct of the study will be agreed upon by the Trial Steering Committee, and will be documented in a memorandum. The Regional Committee on Health Research Ethics may be notified of administrative changes at the discretion of Trial Steering Committee.

**DAN-WAR-D** – Danish Warfarin-Dialysis Study (Research protocol, version 1.26, 17/2-23, EUDRACT 2018-000484-86, CTIS 2022-502500-75-00)

## **Recruitment and informed consent**

Recruitment will adhere to all relevant provisions of the Research Ethics Committee pertaining to informed consent. Patients will be recruited by on-site physicians under guidance by the lead investigator at each distinct dialysis centre. Recruiting physicians will inform potential participants of their entitlement to guidance and council by a patient assessor prior to being informed on the study, and aid in securing council for the informed consent if so indicated. Recruiting physicians will introduce the trial to patients and provide information sheets, thus enabling an informed discussion of potential benefits and harms. Participants will be informed on the globally strict data confidentiality pertaining to personal data in Denmark, and on the employment of register-based follow-up by authorized persons in the study. Recruiting physicians will obtain oral and written consent from patients willing to participate in the trial. Recruitment and informed consent will be attained with consideration for disturbances and patient deliberation. Appropriate emphasis will be placed on the non-compulsory nature of study participation, with particular emphasis placed on the non-consequential significance of non-participation on treatments beyond the trial.

Recruitment of patients to the study entails screening and randomization. At screening, patients will be approached by on-site physicians upon verification of atrial fibrillation or flutter by electrocardiogram, typically while receiving ambulatory dialysis treatment. Patients will initially receive a short oral presentation of the study by the on-site physician as previously described. Following the oral presentation, patients will receive written information pertaining to the study with allowance for a minimum of one hour delay to permit comprehension. Patients may opt for additional time. Following the delay, the patient will be approached by study personnel who will provide oral information and answers to trial-related questions. As part of the screening procedure, the on-site physician will secure relevant laboratory testing to ensure against inclusion of patients meeting exclusion criteria as defined in the study schedule of appointments. All such study-related procedures will however not be performed until signing of the written informed consent.

**DAN-WAR-D** – Danish Warfarin-Dialysis Study (Research protocol, version 1.26, 17/2-23, EUDRACT 2018-000484-86, CTIS 2022-502500-75-00)

Randomization will be performed upon signing of the written informed consent. The written informed consent must be signed <7 days of being approached for trial inclusion. Patients may waive their right to delay between screening and randomization.

Oral and written presentation of the trial will be effectuated within the context of quiet and undisturbed surroundings. Patients will be informed of their right to outside council during presentation of the trial. Furthermore, patients will be informed of their entitlement to delay between oral and written presentation and authorizing of the written informed consent. All patients will be unambiguously informed as to the non-binding nature of the informed consent; specifically, patients will be informed as to the non-restricted right to 'voluntary withdrawal of consent' i.e. the non-restricted right of patients to withdraw from the study at any time and for any reason, or no reason at all without risk of retribution. Of note, female patients with childbearing potential will be informed of the requirement of the use of highly effective prevention 6 weeks beyond the end of the trial. On-site investigators will register baseline data and perform review of study patients medication at the time of randomization.

### **Ethical considerations**

The trial will be conducted in adherence to the Helsinki Declaration and to the standards of Good Clinical Practice.<sup>77</sup>  
<sup>78</sup> Currently, there is no conclusive evidence from randomized clinical trials on the potential benefit or harm of warfarin in dialysis-treated patients with end-stage renal disease and atrial fibrillation. Warfarin is widely but non-systematically used for stroke risk reduction in dialysis-treated patients with end-stage renal disease and atrial fibrillation, and the indications employed for inclusion in the present trial are consistent with observed clinical practice and the summary of product characteristics as defined by the Danish Medicines Agency. As such, trial participants will not be exposed to unknown risk. Warfarin is associated with both specific benefit and harm; benefit in terms of substantial stroke risk reduction, and harm in terms of increase risk of bleeding and possibly accelerated arteriosclerosis. The research question is however undeniably in the interest of the general public – specifically the patients planned for inclusion in the study -, and the trial design will provide meaningful data with potential for statistical significance leading to an acceptance or rejection of the null hypothesis with direct clinical implications.

**DAN-WAR-D** – Danish Warfarin-Dialysis Study (Research protocol, version 1.26, 17/2-23, EUDRACT 2018-000484-86, CTIS 2022-502500-75-00)

### **Data confidentiality**

All study-related information will be stored securely at the study site. Administrative forms will be stored in locked file cabinets in areas with limited access. All data recorded will be secured in a central database using the REDCap webapplication. Data management will be administered via the Danish in accordance with governing rules and regulations. Participant information will not be released outside of the study. The Trial Steering Committee will be given access to distilled de-identified data sets within the framework of Statistics Denmark.

### **Data sharing statement**

No later than 3 years after the collection of the one-year post-randomization results, a completely de-identified dataset will be delivered to an appropriate data archive for sharing purposes.

DAN-WAR-D – Danish Warfarin-Dialysis Study (Research protocol, version 1.26, 17/2-23, EUDRACT 2018-000484-86, CTIS 2022-502500-75-00)

## References

1. <http://nephrology.dk/wp-content/uploads/2017/08/%C3%85rsrapport-2016.pdf>.
2. Roberts MA, Polkinghorne KR, McDonald SP, Ierino FL. Secular trends in cardiovascular mortality rates of patients receiving dialysis compared with the general population. *Am J Kidney Dis*. 2011;58:64-72
3. Saran R, Robinson B, Abbott KC, Agodoa LYC, Bhave N, Bragg-Gresham J, et al. Us renal data system 2017 annual data report: Epidemiology of kidney disease in the united states. *Am J Kidney Dis*. 2018;71:A7
4. Collins AJ, Foley RN, Herzog C, Chavers B, Gilbertson D, Ishani A, et al. United states renal data system 2008 annual data report. *Am J Kidney Dis*. 2009;53:S1-374
5. Longenecker JC, Coresh J, Powe NR, Levey AS, Fink NE, Martin A, et al. Traditional cardiovascular disease risk factors in dialysis patients compared with the general population: The choice study. *Journal of the American Society of Nephrology : JASN*. 2002;13:1918-1927
6. Masson P, Kelly PJ, Craig JC, Lindley RI, Webster AC. Risk of stroke in patients with esrd. *Clin J Am Soc Nephrol*. 2015;10:1585-1592
7. Sarnak MJ, Levey AS. Cardiovascular disease and chronic renal disease: A new paradigm. *Am J Kidney Dis*. 2000;35:S117-131
8. Patel NJ, Deshmukh A, Pant S, Singh V, Patel N, Arora S, et al. Contemporary trends of hospitalization for atrial fibrillation in the united states, 2000 through 2010: Implications for healthcare planning. *Circulation*. 2014;129:2371-2379
9. Winkelmayer WC, Patrick AR, Liu J, Brookhart MA, Setoguchi S. The increasing prevalence of atrial fibrillation among hemodialysis patients. *Journal of the American Society of Nephrology : JASN*. 2011;22:349-357
10. Wolf PA, Abbott RD, Kannel WB. Atrial fibrillation as an independent risk factor for stroke: The framingham study. *Stroke*. 1991;22:983-988
11. Hart RG, Pearce LA, Aguilar MI. Meta-analysis: Antithrombotic therapy to prevent stroke in patients who have nonvalvular atrial fibrillation. *Ann Intern Med*. 2007;146:857-867

**DAN-WAR-D** – Danish Warfarin-Dialysis Study (Research protocol, version 1.26, 17/2-23, EUDRACT 2018-000484-86, CTIS 2022-502500-75-00)

12. Lip GY, Nieuwlaat R, Pisters R, Lane DA, Crijns HJ. Refining clinical risk stratification for predicting stroke and thromboembolism in atrial fibrillation using a novel risk factor-based approach: The euro heart survey on atrial fibrillation. *Chest*. 2010;137:263-272
13. Pisters R, Lane DA, Nieuwlaat R, de Vos CB, Crijns HJ, Lip GY. A novel user-friendly score (has-bled) to assess 1-year risk of major bleeding in patients with atrial fibrillation: The euro heart survey. *Chest*. 2010;138:1093-1100
14. January CT, Wann LS, Alpert JS, Calkins H, Cigarroa JE, Cleveland JC, Jr., et al. 2014 aha/acc/hrs guideline for the management of patients with atrial fibrillation: A report of the american college of cardiology/american heart association task force on practice guidelines and the heart rhythm society. *J Am Coll Cardiol*. 2014;64:e1-76
15. Kirchhof P, Benussi S, Kotecha D, Ahlsson A, Atar D, Casadei B, et al. 2016 esc guidelines for the management of atrial fibrillation developed in collaboration with eacts: The task force for the management of atrial fibrillation of the european society of cardiology (esc) developed with the special contribution of the european heart rhythm association (ehra) of the esc endorsed by the european stroke organisation (eso). *European heart journal*. 2016
16. Steffel J, Verhamme P, Potpara TS, Albaladejo P, Antz M, Desteghe L, et al. The 2018 european heart rhythm association practical guide on the use of non-vitamin k antagonist oral anticoagulants in patients with atrial fibrillation. *European heart journal*. 2018;39:1330-1393
17. Iguchi Y, Kimura K, Kobayashi K, Aoki J, Terasawa Y, Sakai K, et al. Relation of atrial fibrillation to glomerular filtration rate. *Am J Cardiol*. 2008;102:1056-1059
18. Baber U, Howard VJ, Halperin JL, Soliman EZ, Zhang X, McClellan W, et al. Association of chronic kidney disease with atrial fibrillation among adults in the united states: Reasons for geographic and racial differences in stroke (regards) study. *Circ Arrhythm Electrophysiol*. 2011;4:26-32
19. Alonso A, Lopez FL, Matsushita K, Loehr LR, Agarwal SK, Chen LY, et al. Chronic kidney disease is associated with the incidence of atrial fibrillation: The atherosclerosis risk in communities (aric) study. *Circulation*. 2011;123:2946-2953
20. Zimmerman D, Sood MM, Rigatto C, Holden RM, Hiremath S, Clase CM. Systematic review and meta-analysis of incidence, prevalence and outcomes of atrial fibrillation in patients on dialysis. *Nephrol Dial Transplant*. 2012;27:3816-3822



**DAN-WAR-D** – Danish Warfarin-Dialysis Study (Research protocol, version 1.26, 17/2-23, EUDRACT 2018-000484-86, CTIS 2022-502500-75-00)

21. Liao JN, Chao TF, Liu CJ, Wang KL, Chen SJ, Lin YJ, et al. Incidence and risk factors for new-onset atrial fibrillation among patients with end-stage renal disease undergoing renal replacement therapy. *Kidney Int.* 2015;87:1209-1215
22. Genovesi S, Pogliani D, Faini A, Valsecchi MG, Riva A, Stefani F, et al. Prevalence of atrial fibrillation and associated factors in a population of long-term hemodialysis patients. *Am J Kidney Dis.* 2005;46:897-902
23. Goldstein BA, Arce CM, Hlatky MA, Turakhia M, Setoguchi S, Winkelmayer WC. Trends in the incidence of atrial fibrillation in older patients initiating dialysis in the united states. *Circulation.* 2012;126:2293-2301
24. Olesen JB, Lip GY, Kamper AL, Hommel K, Kober L, Lane DA, et al. Stroke and bleeding in atrial fibrillation with chronic kidney disease. *N Engl J Med.* 2012;367:625-635
25. Winkelmayer WC, Liu J, Setoguchi S, Choudhry NK. Effectiveness and safety of warfarin initiation in older hemodialysis patients with incident atrial fibrillation. *Clin J Am Soc Nephrol.* 2011;6:2662-2668
26. Saran R, Li Y, Robinson B, Abbott KC, Agodoa LY, Ayanian J, et al. Us renal data system 2015 annual data report: Epidemiology of kidney disease in the united states. *Am J Kidney Dis.* 2016;67:Svii, S1-305
27. Sohal AS, Gangji AS, Crowther MA, Treleaven D. Uremic bleeding: Pathophysiology and clinical risk factors. *Thrombosis research.* 2006;118:417-422
28. Weigert AL, Schafer AI. Uremic bleeding: Pathogenesis and therapy. *Am J Med Sci.* 1998;316:94-104
29. Galbusera M, Remuzzi G, Boccardo P. Treatment of bleeding in dialysis patients. *Semin Dial.* 2009;22:279-286
30. Schurgers LJ, Joosen IA, Laufer EM, Chatrou ML, Herfs M, Winkens MH, et al. Vitamin k-antagonists accelerate atherosclerotic calcification and induce a vulnerable plaque phenotype. *PLoS one.* 2012;7:e43229
31. Luo G, Ducy P, McKee MD, Pinero GJ, Loyer E, Behringer RR, et al. Spontaneous calcification of arteries and cartilage in mice lacking matrix gla protein. *Nature.* 1997;386:78-81
32. Nigwekar SU, Kroshinsky D, Nazarian RM, Goverman J, Malhotra R, Jackson VA, et al. Calciphylaxis: Risk factors, diagnosis, and treatment. *Am J Kidney Dis.* 2015;66:133-146
33. Chan KE, Lazarus JM, Thadhani R, Hakim RM. Warfarin use associates with increased risk for stroke in hemodialysis patients with atrial fibrillation. *Journal of the American Society of Nephrology : JASN.* 2009;20:2223-2233

**DAN-WAR-D** – Danish Warfarin-Dialysis Study (Research protocol, version 1.26, 17/2-23, EUDRACT 2018-000484-86, CTIS 2022-502500-75-00)

34. Limdi NA, Beasley TM, Baird MF, Goldstein JA, McGwin G, Arnett DK, et al. Kidney function influences warfarin responsiveness and hemorrhagic complications. *Journal of the American Society of Nephrology : JASN*. 2009;20:912-921
35. Shen JI, Montez-Rath ME, Lenihan CR, Turakhia MP, Chang TI, Winkelmayr WC. Outcomes after warfarin initiation in a cohort of hemodialysis patients with newly diagnosed atrial fibrillation. *Am J Kidney Dis*. 2015;66:677-688
36. Shah M, Avgil Tsadok M, Jackevicius CA, Essebag V, Eisenberg MJ, Rahme E, et al. Warfarin use and the risk for stroke and bleeding in patients with atrial fibrillation undergoing dialysis. *Circulation*. 2014;129:1196-1203
37. Genovesi S, Rossi E, Gallieni M, Stella A, Badiali F, Conte F, et al. Warfarin use, mortality, bleeding and stroke in haemodialysis patients with atrial fibrillation. *Nephrol Dial Transplant*. 2015;30:491-498
38. Bonde AN, Lip GY, Kamper AL, Hansen PR, Lamberts M, Hommel K, et al. Net clinical benefit of antithrombotic therapy in patients with atrial fibrillation and chronic kidney disease: A nationwide observational cohort study. *J Am Coll Cardiol*. 2014;64:2471-2482
39. Wizemann V, Tong L, Satayathum S, Disney A, Akiba T, Fissell RB, et al. Atrial fibrillation in hemodialysis patients: Clinical features and associations with anticoagulant therapy. *Kidney Int*. 2010;77:1098-1106
40. Wiesholzer M, Harm F, Tomasec G, Barbieri G, Putz D, Balcke P. Incidence of stroke among chronic hemodialysis patients with nonrheumatic atrial fibrillation. *Am J Nephrol*. 2001;21:35-39
41. Lai HM, Aronow WS, Kalen P, Adapa S, Patel K, Goel A, et al. Incidence of thromboembolic stroke and of major bleeding in patients with atrial fibrillation and chronic kidney disease treated with and without warfarin. *Int J Nephrol Renovasc Dis*. 2009;2:33-37
42. Tan J, Liu S, Segal JB, Alexander GC, McAdams-DeMarco M. Warfarin use and stroke, bleeding and mortality risk in patients with end stage renal disease and atrial fibrillation: A systematic review and meta-analysis. *BMC Nephrol*. 2016;17:157
43. Workgroup KD. K/DOQI clinical practice guidelines for cardiovascular disease in dialysis patients. *Am J Kidney Dis*. 2005;45:S1-153
44. Juma S, Thomson BK, Lok CE, Clase CM, Blake PG, Moist L. Warfarin use in hemodialysis patients with atrial fibrillation: Decisions based on uncertainty. *BMC Nephrol*. 2013;14:174

**DAN-WAR-D** – Danish Warfarin-Dialysis Study (Research protocol, version 1.26, 17/2-23, EUDRACT 2018-000484-86, CTIS 2022-502500-75-00)

45. Wong CX, Odutayo A, Emdin CA, Kinnear NJ, Sun MT. Meta-analysis of anticoagulation use, stroke, thromboembolism, bleeding, and mortality in patients with atrial fibrillation on dialysis. *Am J Cardiol.* 2016;117:1934-1941
46. Keeling D, Baglin T, Tait C, Watson H, Perry D, Baglin C, et al. Guidelines on oral anticoagulation with warfarin - fourth edition. *Br J Haematol.* 2011;154:311-324
47. [https://www.sst.dk/da/udgivelser/2014/~/\\_media/C0B72AFCC0EE3E309DA8579D6CAF42AA.ashx](https://www.sst.dk/da/udgivelser/2014/~/_media/C0B72AFCC0EE3E309DA8579D6CAF42AA.ashx).
48. [http://nbv.cardio.dk/ak#afs14\\_1\\_5](http://nbv.cardio.dk/ak#afs14_1_5).
49. Suzuki S, Yamashita T, Kato T, Fujino T, Sagara K, Sawada H, et al. Incidence of major bleeding complication of warfarin therapy in japanese patients with atrial fibrillation. *Circ J.* 2007;71:761-765
50. Hollowell J, Ruigomez A, Johansson S, Wallander MA, Garcia-Rodriguez LA. The incidence of bleeding complications associated with warfarin treatment in general practice in the united kingdom. *The British journal of general practice : the journal of the Royal College of General Practitioners.* 2003;53:312-314
51. Garcia DA, Lopes RD, Hylek EM. New-onset atrial fibrillation and warfarin initiation: High risk periods and implications for new antithrombotic drugs. *Thrombosis and haemostasis.* 2010;104:1099-1105
52. Hylek EM, Evans-Molina C, Shea C, Henault LE, Regan S. Major hemorrhage and tolerability of warfarin in the first year of therapy among elderly patients with atrial fibrillation. *Circulation.* 2007;115:2689-2696
53. Hylek EM, Go AS, Chang Y, Jensvold NG, Henault LE, Selby JV, et al. Effect of intensity of oral anticoagulation on stroke severity and mortality in atrial fibrillation. *N Engl J Med.* 2003;349:1019-1026
54. Hylek EM, Singer DE. Risk factors for intracranial hemorrhage in outpatients taking warfarin. *Ann Intern Med.* 1994;120:897-902
55. Palareti G, Leali N, Coccheri S, Poggi M, Manotti C, D'Angelo A, et al. Bleeding complications of oral anticoagulant treatment: An inception-cohort, prospective collaborative study (iscoat). Italian study on complications of oral anticoagulant therapy. *Lancet.* 1996;348:423-428
56. Annual report, danish nephrology register. 2015
57. Kildemoes HW, Sorensen HT, Hallas J. The danish national prescription registry. *Scand J Public Health.* 2011;39:38-41

**DAN-WAR-D** – Danish Warfarin-Dialysis Study (Research protocol, version 1.26, 17/2-23, EUDRACT 2018-000484-86, CTIS 2022-502500-75-00)

58. Thygesen SK, Christiansen CF, Christensen S, Lash TL, Sorensen HT. The predictive value of icd-10 diagnostic coding used to assess charlson comorbidity index conditions in the population-based danish national registry of patients. *BMC Med Res Methodol*. 2011;11:83
59. Rasmussen L, Valentin J, Gesser KM, Hallas J, Pottegard A. Validity of the prescriber information in the danish national prescription registry. *Basic Clin Pharmacol Toxicol*. 2016
60. Hommel K, Rasmussen S, Madsen M, Kamper AL. The danish registry on regular dialysis and transplantation: Completeness and validity of incident patient registration. *Nephrol Dial Transplant*. 2010;25:947-951
61. Schulman S, Kearon C, Subcommittee on Control of Anticoagulation of the S, Standardization Committee of the International Society on T, Haemostasis. Definition of major bleeding in clinical investigations of antihemostatic medicinal products in non-surgical patients. *J Thromb Haemost*. 2005;3:692-694
62. Krarup LH, Boysen G, Janjua H, Prescott E, Truelsen T. Validity of stroke diagnoses in a national register of patients. *Neuroepidemiology*. 2007;28:150-154
63. Wildenschild C, Mehnert F, Thomsen RW, Iversen HK, Vestergaard K, Ingeman A, et al. Registration of acute stroke: Validity in the danish stroke registry and the danish national registry of patients. *Clin Epidemiol*. 2014;6:27-36
64. Schwarz UI, Ritchie MD, Bradford Y, Li C, Dudek SM, Frye-Anderson A, et al. Genetic determinants of response to warfarin during initial anticoagulation. *N Engl J Med*. 2008;358:999-1008
65. Carlson N. Use of warfarin in end-stage renal disease and atrial fibrillation: Risk of stroke and bleeding - a nationwide cohort study. *Nephrol Dial Transplant*. 2018;33:i3
66. Hernan MA, Robins JM. Estimating causal effects from epidemiological data. *Journal of epidemiology and community health*. 2006;60:578-586
67. van Walraven C, Hart RG, Singer DE, Laupacis A, Connolly S, Petersen P, et al. Oral anticoagulants vs aspirin in nonvalvular atrial fibrillation: An individual patient meta-analysis. *Jama*. 2002;288:2441-2448
68. Burton C, Isles C, Norrie J, Hanson R, Grubb E. The safety and adequacy of antithrombotic therapy for atrial fibrillation: A regional cohort study. *The British journal of general practice : the journal of the Royal College of General Practitioners*. 2006;56:697-702

**DAN-WAR-D** – Danish Warfarin-Dialysis Study (Research protocol, version 1.26, 17/2-23, EUDRACT 2018-000484-86, CTIS 2022-502500-75-00)

69. Ogilvie IM, Welner SA, Cowell W, Lip GY. Ischaemic stroke and bleeding rates in 'real-world' atrial fibrillation patients. *Thrombosis and haemostasis*. 2011;106:34-44
70. Chen PC, Lip GY, Yeh G, Lin HJ, Chien KL. Risk of bleeding and stroke with oral anticoagulation and antiplatelet therapy in patients with atrial fibrillation in taiwan: A nationwide cohort study. *PloS one*. 2015;10:e0125257
71. Carlson N. Unpublished data.
72. Falga C, Capdevila JA, Soler S, Rabunal R, Sanchez Munoz-Torrero JF, Gallego P, et al. Clinical outcome of patients with venous thromboembolism and renal insufficiency. Findings from the riete registry. *Thrombosis and haemostasis*. 2007;98:771-776
73. Garcia P, Ruiz W, Loza Munarriz C. Warfarin initiation nomograms for venous thromboembolism. *Cochrane Database Syst Rev*. 2016:CD007699
74. Kutner NG. Improving compliance in dialysis patients: Does anything work? *Semin Dial*. 2001;14:324-327
75. Chiu YW, Teitelbaum I, Misra M, de Leon EM, Adzize T, Mehrotra R. Pill burden, adherence, hyperphosphatemia, and quality of life in maintenance dialysis patients. *Clin J Am Soc Nephrol*. 2009;4:1089-1096
76. Fihn SD, McDonnell M, Martin D, Henikoff J, Vermes D, Kent D, et al. Risk factors for complications of chronic anticoagulation. A multicenter study. Warfarin optimized outpatient follow-up study group. *Ann Intern Med*. 1993;118:511-520
77. World Medical A. World medical association declaration of helsinki: Ethical principles for medical research involving human subjects. *Jama*. 2013;310:2191-2194
78. ICH-GCP. International conference on harmonisation of technical requirements for registration of pharmaceuticals for human use.

DAN-WAR-D – Danish Warfarin-Dialysis Study (Research protocol, version 1.26, 17/2-23, EUDRACT 2018-000484-86, CTIS 2022-502500-75-00)

## Appendix

### Supplementary table S1 Overview of the CHA2DS2-VASc and HAS-BLED algorithms

| CHA2DS2-VASc risk factors                                            | Score  |
|----------------------------------------------------------------------|--------|
| C: Congestive heart failure / Left ventricular dysfunction           | 1      |
| H: Hypertension                                                      | 1      |
| A: Age $\geq$ 75 years                                               | 2      |
| D: Diabetes                                                          | 1      |
| S: Prior stroke, transient ischemic attack, and/or systemic embolism | 2      |
| V: Prior myocardial infarction or peripheral vascular disease        | 1      |
| A: Age 65-74 years                                                   | 1      |
| Sc: Gender female                                                    | 1      |
| <b>HAS-BLED risk factors</b>                                         |        |
| H: Hypertension                                                      | 1      |
| A: Abnormal renal or liver function                                  | 1 or 2 |
| S: Prior stroke                                                      | 1      |
| B: Prior major bleeding                                              | 1      |
| L: Labile INR (Time in therapeutic interval < 60%)                   | 1      |
| E: Elderly (age > 65 years)                                          | 1      |
| D: Drug or alcohol abuse                                             | 1 or 2 |

DAN-WAR-D – Danish Warfarin-Dialysis Study (Research protocol, version 1.26, 17/2-23, EUDRACT 2018-000484-86, CTIS 2022-502500-75-00)

### Supplementary table S2 Dialysis centers (including satellite units) in Denmark

#### Dialysis Center (with satellite units)

---

1. Aalborg University Hospital (including satellite unit at Vendsyssel and Thy-Mors Hospitals)
2. Aarhus University Hospital (including satellite unit at Horsens and Randers Hospital)
- 3- Herlev Hospital (including satellite unit at Hvidovre Hospital)
4. Holbæk Hospital (including satellite unit at Slagelse Hospital)
5. Holstebro Regional Hospital
6. Hospital Lillebaelt
7. Hospital of Bornholm
8. Hospital of Southern Jutland
- 9.. Hospital South West Jutland
10. North Zealand Hospital
11. Odense University Hospital (including satellite unit at Svendborg Hospital)
12. Rigshospitalet (including satellite unit at Frederiksberg Hospital)
13. Viborg Regional Hospital
14. Zealand University Hospital Roskilde (including satellite unit at Nykøbing-Falster Hospital)

**DAN-WAR-D** – Danish Warfarin-Dialysis Study (Research protocol, version 1.26, 17/2-23, EUDRACT 2018-000484-86, CTIS 2022-502500-75-00)

### Supplementary table S3 Trial Steering Committee

- Nicholas Carlson MD PhD, Staff specialist at the Department of Nephrology, Copenhagen University Hospital Rigshospitalet
- Professor Gunnar Gislason, MD PhD FESC FACC FAHA, Chief Physician at the Department of Cardiology, Copenhagen University Hospital Gentofte & Director of Research, The Danish Heart Foundation
- Professor Christian Torp-Pedersen, MD DMSc FACC FESC, Chief Physician at the Department of Cardiology, North Zealand Hospital, Hillerød
- Anne-Lise Kamper. MD DMSc, Chief Physician at the Department of Nephrology, Copenhagen University Hospital Rigshospitalet
- Jonas Bjerring Olesen, MD PhD, Staff specialist at the Department of Cardiology, Copenhagen University Hospital Gentofte
- Associate professor Casper Bang, MD PhD. Chief Physician at the Department of Cardiology, Frederiksberg and Bispebjerg Hospital, Copenhagen
- Professor Thomas Alexander Gerds, the Danish Heart Foundation, Vognmagergade 7, 3. 1120 Copenhagen, Denmark, and Section of Biostatistics, University of Copenhagen
- Ditte Hansen, MD PhD, Chief Physician at the Department of Nephrology, Copenhagen University Hospital Herlev
- Professor, Morten Schou, MD PhD, Chief Physician at the Department of Cardiology, Copenhagen University Hospital Herlev
- Professor Mads Hornum, MD PhD, Chief Physician at the Department of Nephrology, Copenhagen University Hospital Rigshospitalet
- Associate professor Erik Grove, MD PhD, Chief Physician at the Department of Cardiology, Aarhus University Hospital
- Associate professor Jens Dam Jensen, MD PhD, Chief Physician at the Department of Nephrology, Aarhus University Hospital



**DAN-WAR-D** – Danish Warfarin-Dialysis Study (Research protocol, version 1.26, 17/2-23, EUDRACT 2018-000484-86, CTIS 2022-502500-75-00)

- Ellen Linnea Freese Ballegaard, MD, PhD-student at the Department of Nephrology, Copenhagen University Hospital Rigshospitalet

DAN-WAR-D – Danish Warfarin-Dialysis Study (Research protocol, version 1.26, 17/2-23, EUDRACT 2018-000484-86, CTIS 2022-502500-75-00)

### Supplementary table S4 Study schedule of appointments

|                                             | Screening | Randomization | Monthly review<br>1 month intervals<br>(+/- 1 weeks) | Quarterly review<br>3 month intervals<br>(+/- 1 weeks) | Annual review<br>(+/- 1 month) | End of Treatment | Termination of followup<br>End of treatment +6 weeks |
|---------------------------------------------|-----------|---------------|------------------------------------------------------|--------------------------------------------------------|--------------------------------|------------------|------------------------------------------------------|
| Study presentation                          | •         |               |                                                      |                                                        |                                |                  |                                                      |
| ECG / Holter / Event recorder               | •         |               |                                                      |                                                        |                                |                  |                                                      |
| Baseline blood tests <sup>1</sup>           | •         |               |                                                      |                                                        |                                |                  |                                                      |
| Pregnancy test <sup>2</sup>                 | •         |               | •                                                    |                                                        |                                |                  |                                                      |
| Informed consent                            | •         |               |                                                      |                                                        |                                |                  |                                                      |
| Registration of baseline data               |           | •             |                                                      |                                                        |                                |                  |                                                      |
| Medication review                           |           | •             |                                                      |                                                        |                                | •                |                                                      |
| International normalized ratio <sup>3</sup> |           |               | •                                                    | •                                                      | •                              | •                |                                                      |
| Patient-reported adherence <sup>4</sup>     |           |               |                                                      | •                                                      | •                              | •                |                                                      |
| Discontinuation cause                       |           |               |                                                      |                                                        |                                | (•)              |                                                      |
| Efficacy outcomes <sup>5</sup>              |           |               | •                                                    | •                                                      | •                              | •                | •                                                    |
| Safety outcomes <sup>5</sup>                |           |               | •                                                    | •                                                      | •                              | •                | •                                                    |
| SAEs / SARs <sup>5</sup>                    |           |               | •                                                    | •                                                      | •                              | •                | •                                                    |

<sup>1</sup> Plasma-hemoglobin, platelet count, albumin, phosphate, ionized-calcium, parathyroid hormone, c-reactive protein, urea nitrogen, and creatinine.

<sup>2</sup> Required in all women of childbearing potential at inclusion and monthly throughout the trial. Women of non-childbearing potential are defined as having no uterus, ligation of the fallopian tubes, permanent cessation of ovarian function due to ovarian failure or surgical removal of the ovaries, or infertility due to natural causes i.e. amenorrhia >12 months or an FSH >40 IU/L

<sup>3</sup> Last recorded international normalized ratio

<sup>4</sup> Patient-reported adherence: As defined by informed non-adherence > 1 week.

<sup>5</sup> Safety and efficacy outcomes, SAEs/SARs will be recorded continuously with reporting of SAEs/SARs to the study sponsor within 24 hours of identification for assessment. Retrospective registration of endpoints in the webapplication REDCap will at minimum be performed within the context of the quarterly reviews.

DAN-WAR-D – Danish Warfarin-Dialysis Study (Research protocol, version 1.26, 17/2-23, EUDRACT 2018-000484-86, CTIS 2022-502500-75-00)

## Supplementary Figure S1 Guideline pertaining to warfarin treatment from the Danish Health Authority

## Start af warfarinbehandling

Opstart af antikoagulansbehandling med warfarintabletter á 2,5 mg (Marevan®, Waran®, Warfarin "Orion")

| DAGE     | INR   | TABLETTER PR DAG |       |           |           |           |       |
|----------|-------|------------------|-------|-----------|-----------|-----------|-------|
| Dag 1-4  |       | 2                |       |           |           |           |       |
| Dag 5    | Måles | INR              | < 1,8 | 1,8 - 2,4 | 2,5 - 3,0 | 3,1 - 3,5 | > 3,5 |
|          |       |                  | ↓     | ↓         | ↓         | ↓         | ↓     |
|          |       | TABLETTER PR DAG |       |           |           |           |       |
| Dag 5-7  |       | 2                | 1,5   | 1         | 0,5       | 0         |       |
|          |       | TABLETTER PR UGE |       |           |           |           |       |
| Dag 8-15 | Måles | < 1,8 →          | 16    | 13        | 10        | 6         | 4     |
|          |       | 1,8 - 2,4 →      | 14    | 11        | 8         | 5         | 3     |
|          |       | 2,5 - 3,0 →      | 12    | 9         | 7         | 4         | 2     |
|          |       | 3,1 - 3,5 →      | 10    | 7         | 5         | 3         | 1     |
|          |       | > 3,5 →          | 8     | 6         | 4         | 2         | 0     |

Tabletterne fordeles så jævnt som muligt over ugedagene.

Næste INR: Dag 12 Dag 15

Hos patienter > 80 år reduceres dosis med 25-50%

## Regulering af warfarinbehandling

| 2,0 - 3,0 | ← TERAPEUTISK INR-INTERVAL →                                                                                         | 2,5 - 3,5                    |           |
|-----------|----------------------------------------------------------------------------------------------------------------------|------------------------------|-----------|
| INR MÅLT  | STRAKSBEHANDLING                                                                                                     | VEDLIGEHOLDELSESDOSIS        | INR MÅLT  |
| > 10      | Vitamin K<br>Indlæggelse anbefales<br>Ved blødning: friskfrossen plasma<br>Pause med warfarin indtil INR er i niveau | Nedsættes med 50% eller mere | > 10      |
| 6,0 - 10  | Vitamin K<br>Indlæggelse overvejes<br>Ved blødning: friskfrossen plasma<br>Pause med warfarin i 2-4 dage             | Nedsættes med 30 - 40%       | 7,0 - 10  |
| 5,0 - 5,9 | Behandlingspause 1 - 2 dage                                                                                          | Nedsættes med 20 - 30%       | 5,5 - 6,9 |
| 3,5 - 4,9 | Behandlingspause 0 - 1 dag                                                                                           | Nedsættes med 10 - 20%       | 4,0 - 5,4 |
| 3,1 - 3,4 | Ingen                                                                                                                | Nedsættes med 0 - 10%        | 3,6 - 3,9 |
| 2,0 - 3,0 | Ingen                                                                                                                | Ingen ændring                | 2,5 - 3,5 |
| 1,7 - 1,9 | Ingen                                                                                                                | Øges med 0 - 10%             | 2,1 - 2,4 |
| 1,5 - 1,6 | Dobbelt døgndosis af warfarin i 1 dag                                                                                | Øges med 20 - 30%            | 1,7 - 2,0 |
| < 1,5     | Dobbelt døgndosis af warfarin i 1 dag<br>Giv evt. lavmolekylært heparin                                              | Øges med 40 - 50%            | < 1,7     |

Ved pause med warfarin skal patienter, som får lav dosis (1 tablet daglig) holde længst pause, mens patienter, som får høj dosis (> 3 tabletter daglig) holder kortest pause, og patienter, som får middeldosis (2 tabletter daglig) holder intermedieær pause. Vedligeholdelsesdosis ændres kun, hvis den ændrede warfarinfølsomhed forventes at fortsætte i den følgende periode.

INR bør kontrolleres igen inden for en uge.

De foreslåede ændringer i vedligeholdelsesdosis forudsætter steady-state (uændret dosis af warfarin i mindst 1 uge).

**DAN-WAR-D** – Danish Warfarin-Dialysis Study (Research protocol, version 1.26, 17/2-23, EUDRACT 2018-000484-86, CTIS 2022-502500-75-00)

### Supplementary Figure S2 Labelling example for study medicine

|                                                                             |                   |
|-----------------------------------------------------------------------------|-------------------|
| <b>Sygehusapoteket Region Hovedstaden</b>                                   |                   |
| Til klinisk forsøg: The Danish Warfarin-Dialysis Study                      |                   |
| Warfarin 2.5mg                                                              | Tabletter 100 stk |
| Randomiseringsnummer: 027                                                   |                   |
| Oral anvendelse                                                             |                   |
| Dosering efter aftale med ordinerende læge                                  |                   |
| Opbevares utilgængeligt for børn                                            |                   |
| Anvendes inden: 30.06.2019                                                  | Batchnr.: 543921  |
| Læge Nicholas Carlson,<br>Nefrologisk Afdeling, Rigshospitalet. T.:35455927 |                   |

DAN-WAR-D – Danish Warfarin-Dialysis Study (Patientinformation, version 1.16, 10/03-2023, EUDRACT 2018-000484-86)

# **DAN-WAR-D**

## **Danish Warfarin-Dialysis Study**

**Blodfortyndende behandling til forebyggelse af slagtilfælde hos patienter med  
dialysekrævende kronisk nyresvigt og forkammerflimren:  
Et nationalt lodtrækningsforsøg**

---

### **Information til patienter om deltagelse i et forskningsprojekt**

**(indeholder samtykke erklæring)**

DAN-WAR-D – Danish Warfarin-Dialysis Study (Patientinformation, version 1.16, 10/03-2023, EUDRACT 2018-000484-86)

## Forespørgsel om deltagelse

Hermed ønsker vi at spørge, om du vil deltage i et videnskabeligt forsøg vedrørende blodfortyndende behandling. Forsøget udgår fra Nefrologisk afdeling på Rigshospitalet og er etableret i et samarbejde med Hjerteforeningen. Førend du beslutter dig, om du vil deltage i forsøget, er det nødvendigt, at du fuldt ud forstår forsøgets formål og begrundelse. Vi vil derfor bede dig læse følgende deltagerinformation grundigt, hvorefter du vil blive inviteret til en samtale om forsøget, hvori denne deltagerinformation vil blive uddybet, og du vil få mulighed til at stille spørgsmål til forsøget. Du er i forbindelse med denne samtale velkommen til at tage et familiemedlem, en ven eller en bekendt med. Såfremt du beslutter dig for at deltage i forsøget, vil vi bede dig underskrive en samtykkeerklæring. Vær opmærksom på, at du har ret til betænkningstid, før du beslutter, om du vil underskrive samtykkeerklæringen. Det er helt frivilligt at deltage i forsøget, og du kan når som helst og uden yderligere begrundelse trække dit samtykke tilbage, uden at det vil få konsekvenser for din videre behandling i øvrigt.

DAN-WAR-D – Danish Warfarin-Dialysis Study (Patientinformation, version 1.16, 10/03-2023, EUDRACT 2018-000484-86)

## Indledning

Forkammerflimren er en hyppigt forekommende hjerterytmeforstyrrelse. Ubehandlet indebærer tilstanden en øget risiko for slagtilfælde og død. Patienter med kronisk nyresvigt er særligt disponerede for forkammerflimren og er ydermere i særlig risiko for slagtilfælde som følge af forkammerflimren. Forebyggende behandling med blodfortyndende medicin som f.eks. Warfarin anbefales utvetydigt til patienter med bevaret nyrefunktion, idet behandling mere end halverer risikoen for et slagtilfælde. Blodfortyndende behandling forebygger slagtilfælde og blodprotsdannelse ved at hæmme blodets størkningsevne. Patienter med kronisk nyresvigt i dialyse er dog i udgangspunktet særligt disponerede for blødningskomplikationer, hvorfor behandlingen ikke benyttes systematisk hos patienter med kronisk nyresvigt i dialyse og forkammerflimren i Danmark.

## Formål og metode

Undersøgelsens hovedformål er at undersøge betydningen af forebyggende behandling med den blodfortyndende medicin Warfarin på risikoen for slagtilfælde og død hos patienter med kronisk nyresvigt i dialyse og forkammerflimren. Undersøgelsen gennemføres som et nationalt lodtrækningsforsøg med deltagerrekruttering fra alle danske dialyseafdelinger. Deltagende patienter tildeles ved lodtrækning enten behandling med den blodfortyndende medicin Warfarin eller ingen behandling. Warfarin doseres i tabletform. Behandlingen varetages i henhold til gældende behandlingsvejledninger af hospitalslæger på de respektive dialyseafdelinger. Behandling doseres på baggrund af en blodprøve, der tages i forbindelse med dialysebehandlingen, og indebærer forventeligt indtag af 5-10 tabletter ugentligt i hele forsøgets forløb. Behandlingens effekt følges indtil studiets afslutning gennem indberetninger fra deltagende afdelinger. Ved undersøgelsens afslutning sammenlignes forekomsten af slagtilfælde, blødninger og dødsfald mellem deltagere behandlet med den blodfortyndende medicin Warfarin og deltagere, der ikke har modtaget behandling. Forsøget tilsigter at kunne rekruttere omtrent 700 patienter mellem 2019 og 2025.

## Undersøgelsens nytte

Den forebyggende virkning af blodfortyndende behandling med Warfarin er fortsat usikker hos patienter med dialysekrævende nyresvigt og forkammerflimren. Undersøgelsen vil være medvirkende til entydigt at afklare, hvorvidt behandling med den blodfortyndende medicin Warfarin bør tilbydes patienter med dialysekrævende

DAN-WAR-D – Danish Warfarin-Dialysis Study (Patientinformation, version 1.16, 10/03-2023, EUDRACT 2018-000484-86)

nyresvigt og forkammerflimren. Behandlingen kan potentielt medvirke til at reducere antallet af slagtilfælde og dødsfald.

Deltagelse i forsøget vil for den enkelte forsøgspatient medføre mere detaljeret kontrol af dialysebehandlingen, herunder blødningstillænde. Herved tilsigtes en mindske af risikoen for blødningskomplikationer. Det er ikke sikkert, at den enkelte forsøgspatient selv vil få direkte gavn af undersøgelsen, men resultaterne fra undersøgelsen vil medvirke til at hjælpe andre patienter i fremtiden.

Overordnet forventes forsøgets resultater at få afgørende betydning for behandlingen af patienter med dialysekrævende nyresvigt og forkammerflimren i fremtiden, og såfremt forsøgets resultater kan dokumentere en behandlingsgevinst, vil forsøget på direkte vis kunne medvirke til at reducere antallet af slagtilfælde og dødsfald hos patienter med dialysekrævende nyresvigt. Undersøgelsens endelige svar vil først være tilgængelige, når resultaterne er gjort op. Informationer om resultaterne forventes tilgængelige 1 år efter, sidste patient er inkluderet i forsøget.

### **Bivirkninger, risici og ulemper**

Den blodfortyndende medicin, Warfarin, er godkendt af Sundhedsstyrelsen til forebyggelse af slagtilfælde og blodprotsdannelse hos patienter med forkammerflimren hos alle patienter uanset nyrefunktion, og behandlingen anvendes allerede i begrænset omfang blandt patienter med dialysekrævende nyresvigt. Behandling med den blodfortyndende medicin, Warfarin, er forbundet med visse ulemper. Lægemidlet vil blive udskrevet i henhold til gældende behandlingsvejledninger. Deltagelse i studiet vil dog ikke indebære økonomisk ulempe, idet den blodfortyndende behandling, Warfarin, vil blive udleveret gratis til deltagende patienter. Dosisjustering af Warfarin foretages løbende på baggrund af en blodprøve. Deltagelse vil derfor forde hyppigere blodprøvekontrol. Blodprøvekontrol og dosisjustering vil dog for størstedelen af deltagende patienter kunne gennemføres i forbindelse med den vanlige dialysebehandling, hvorved ulempen minimeres.

Behandling med den blodfortyndende medicin, Warfarin, er forbundet med en række beskrevne bivirkninger og risici, herunder øget blødningstendens og overfølsomhedsreaktioner. Særligt fokus vil tillægges blødningskomplikationer. Sjældne bivirkninger indbefatter hudirritation med vævstab, karbetændelse, hårtab og blødninger fra mave-tarm-kanalen.



DAN-WAR-D – Danish Warfarin-Dialysis Study (Patientinformation, version 1.16, 10/03-2023, EUDRACT 2018-000484-86)

## Graviditet og svangerskabsforebyggelse

Er du gravid kan du ikke deltage i denne undersøgelse. Deltagelse i undersøgelsen forudsætter, at kvinder i den fødedygtige alder anvender et effektivt svangerskabsforebyggende middel såsom p-piller eller spiral indtil 6 uger efter undersøgelsens afslutning. Forsøgsdeltagere i den fødedygtige alder vil i tillæg blive graviditetstestet før inklusion i undersøgelsen, samt en gang hver måned så længe undersøgelsen varer.

## Hvis undersøgelsen indstilles før planlagt

Lægen kan lade dig udgå af undersøgelsen såfremt det skønnes, at det er til dit eget bedste. Dette gælder også på trods af, om det skulle være mod din vilje. Endvidere har forskningsgruppen og/eller myndighederne bemyndigelse til at afslutte undersøgelsen før det planlagte tidspunkt under forudsætning af, at du bliver informeret om årsagen herfor.

## Hvis du ikke ønsker at deltage i undersøgelsen

Deltagelse i studiet er fuldstændigt frivilligt, og du kan på ethvert tidspunkt vælge at træde ud af forsøget, uden at det vil influere på dit forhold til afdelingen. Ønsker du ikke at deltage i undersøgelsen, vil du tilbydes det sædvanlige behandlingstilbud i henhold til afdelingens almindelige retningslinjer.

## Anvendelse af persondata i undersøgelsen

Hvis du medvirker i undersøgelsen, vil din læge sende informationer om dig og dit helbred og om forløbet af din sygdom til en central database hos Rigshospitalets Nefrologiske afdeling. Informationerne vil her blive opbevaret og analyseret. Alle informationer vil blive opbevaret sikkert og behandlet strengt fortroligt.

Under forsøget kan hospitalslæger og undersøgelsens hovedansvarlige læge (eller dennes repræsentant) få adgang til din sundhedsjournal med henblik på at indhente nødvendige oplysninger om dit helbred og behandling til brug i analyser af forsøget resultater. Bemyndigede personer fra sundhedsmyndigheder og lægemiddelstyrelse kan endvidere også tilgå din sundhedsjournal for at kontrollere, om forsøget bliver udført retvist.

I tillæg vil der ved samtykke til deltagelse i studiet indhentes specifikke informationer vedrørende tidligere og pågående dialysebehandling, receptpligtig medicin, laboratoriesvar og sygehistorik. Alle oplysninger bliver

DAN-WAR-D – Danish Warfarin-Dialysis Study (Patientinformation, version 1.16, 10/03-2023, EUDRACT 2018-000484-86)

registreret og anvendt i en videnskabelig opgørelse. Dine personlige data vil blive behandlet strengt fortroligt, og ingen oplysninger, som kan henføres til dig personligt, vil blive udleveret til personer uden for den videnskabelige undersøgelsesgruppe. Alt personale involveret i forsøget har tavshedspligt. Hvis du vælger at trække dit informerede samtykke tilbage, vil ingen nye data blive indsamlet og registreret. Imidlertid tillader lovgivningen, at data indsamlet, inden du trækker dit samtykke tilbage, stadig indgår i forsøgets datamateriale. Oplysningerne vil blive registreret og opbevaret i 15 år efter forsøgets afslutning, og de vil blive anvendt i en videnskabelig opgørelse.

### Økonomi

Undersøgelsen udgår fra Nefrologisk Klinik på Rigshospitalet og gennemføres i samarbejde med deltagende dialyseafdelinger. Projektet er støttet af Hjerteforeningens forskningsfond. Udgifter forbundet med rekruttering og behandlingsmonitorering afholdes af den respektive behandlende afdeling. Undersøgelsen er udelukkende videnskabelig med henblik på at forbedre den forebyggende behandling hos patienter med kronisk nyresvigt og forkammerflimren. Ingen af de involverede læger har økonomisk gevinst af undersøgelsen. Du modtager som forsøgsdeltager intet vederlag. Eventuelle ekstraordinære besøg i afdelingen, som forsøget måtte kræve, honoreres efter regler for offentlig transport.

### Deltagelse i undersøgelsen

Det er frivilligt at deltage i undersøgelsen. Meningen med denne skriftlige information er at give dig mulighed for at overveje din deltagelse, herunder at drøfte den med dine nærmest. Det er suverænt din beslutning, om du ønsker at deltage i undersøgelsen. Vælger du at deltage, kan du på et hvilket som helst tidspunkt uden begrundelse trække dig fra undersøgelsen. Vi opfordrer dig og dine nærmeste til at læse vedhæftede folder "Forsøgspersoners rettigheder i et sundhedsvidenskabelig forskningsprojekt". Uanset om du svarer ja, nej eller fortryder på et senere tidspunkt, vil vi fortsat tilbyde dig den bedst mulige behandling af din sygdom. Beslutter du dig for at deltage i undersøgelsen, kræver dansk lov at du bekræfter dette ved at underskrive vedlagte samtykke og fuldmagt.

Efter forsøgets afslutning kan du kontakte din læge, hvis du ønsker at få informationer om resultaterne.

Med venlig hilsen,

DAN-WAR-D studiet

DAN-WAR-D – Danish Warfarin-Dialysis Study (Patientinformation, version 1.16, 10/03-2023, EUDRACT 2018-000484-86)

Hvis du har spørgsmål vedrørende forsøget, er du naturligvis velkommen til at kontakte

**Kontaktlæge:** .....

**E-mail:** .....

**Telefon:** .....

lokale protokolansvarlige investigator

### Koordinerende protokolansvarlige læge

Nicholas Carlson, læge, seniorforsker

Nefrologisk Klinik P, Rigshospitalet

Opgang 2 og 3, 13. sal, Inge Lehmanns Vej 5 og 7

2100 København Ø

telefon 35455927 / mail: [Nicholas.carlson.01@regionh.dk](mailto:Nicholas.carlson.01@regionh.dk)

DAN-WAR-D – Danish Warfarin-Dialysis Study (Patientinformation, version 1.16, 10/03-2023, EUDRACT 2018-000484-86)

## Forsøgspersoners rettigheder i et sundhedsvidenskabeligt forskningsprojekt

Som deltager i et sundhedsvidenskabeligt forskningsprojekt skal du vide, at:

- din deltagelse i forskningsprojektet er helt frivillig og kun kan ske efter, at du har fået både skriftlig og mundtlig information om forskningsprojektet og underskrevet samtykkeerklæringen.
- du til enhver tid mundtligt, skriftligt eller ved anden klar tilkendegivelse kan trække dit samtykke til deltagelse tilbage og udtræde af forskningsprojektet. Såfremt du trækker dit samtykke tilbage påvirker dette ikke din ret til nuværende eller fremtidig behandling eller andre rettigheder, som du måtte have.
- du har ret til at tage et familiemedlem, en ven eller en bekendt med til informationssamtalen.
- du har ret til betænkningstid, før du underskriver samtykkeerklæringen.
- oplysninger om dine helbredsforhold, øvrige rent private forhold og andre fortrolige oplysninger om dig, som fremkommer i forbindelse med forskningsprojektet, er omfattet af tavshedspligt.
- behandling af oplysninger om dig, herunder oplysninger i dine blodprøver og væv, sker efter reglerne i databeskyttelsesforordningen, databeskyttelsesloven samt sundhedsloven. Den dataansvarlige i forsøget skal orientere dig nærmere om dine rettigheder efter databeskyttelsesreglerne.
- der er mulighed for at få aktindsigt i forsøgsprotokoller efter offentlighedslovens bestemmelser. Det vil sige, at du kan få adgang til at se alle papirer vedrørende forsøgets tilrettelæggelse, bortset fra de dele, som indeholder forretningshemmeligheder eller fortrolige oplysninger om andre.
- der er mulighed for at klage og få erstatning efter reglerne i lov om klage- og erstatningsadgang inden for sundhedsvæsenet. Hvis der under forsøget skulle opstå en skade kan du henvende dig til Patienterstatningen, se nærmere på [www.patienterstatningen.dk](http://www.patienterstatningen.dk)

### De Videnskabetiske Komiteer for Region Hovedstaden (6 komiteer)

Tlf.: +45 38 66 63 95  
E-mail: [vek@regionh.dk](mailto:vek@regionh.dk)  
Hjemmeside:  
<https://www.regionh.dk/til-fagfolk/Forskning-og-innovation/Kliniske-test-og-forsoeq/Sider/De-Videnskabetiske-Komiteer.aspx>

### Den Videnskabetiske Komité for Region Sjælland

Tlf.: +45 93 56 60 00  
E-mail: [RVK-sjaelland@regionsjaelland.dk](mailto:RVK-sjaelland@regionsjaelland.dk)  
Hjemmeside:  
<https://www.regionsjaelland.dk/sundhed/forskning/forfaagfolk/videnskabetisk-komite/Sider/default.aspx>

### De Videnskabetiske Komiteer for Region Syddanmark (2 komiteer)

Tlf.: + 45 76 63 82 21  
E-mail: [komite@rsyd.dk](mailto:komite@rsyd.dk)  
Hjemmeside:  
<https://komite.regionsyddanmark.dk/wm258128>

### De Videnskabetiske Komiteer for Region Midtjylland (2 komiteer)

Tlf.: +45 78 41 01 83  
/ +45 78 41 01 82 / +45 78 41 01 81  
E-mail: [komite@rm.dk](mailto:komite@rm.dk)  
Hjemmeside:  
<http://www.komite.rm.dk>

### Den Videnskabetiske Komité for Region Nordjylland

Tlf.: +45 97 64 84 40  
E-mail: [vek@rn.dk](mailto:vek@rn.dk)  
Hjemmeside:  
<http://www.rm.dk/vek>

### National Videnskabetisk Komité

Tlf.: +45 72 21 68 55  
E-mail: [kontakt@nvk.dk](mailto:kontakt@nvk.dk)  
Hjemmeside: <http://www.nvk.dk>

*Dette tillæg er udarbejdet af det videnskabetiske komitésystem og kan vedhæftes den skriftlige information om det sundhedsvidenskabelige forskningsprojekt. Spørgsmål til et konkret projekt skal rettes til projektets forsøgsansvarlige. Generelle spørgsmål til forsøgspersoners rettigheder kan rettes til den komité, som har godkendt projektet.*

Revideret 21. september 2019

DAN-WAR-D – Danish Warfarin-Dialysis Study (Patientinformation, version 1.16, 10/03-2023, EUDRACT 2018-000484-86)

[Patient-label]

## DAN - WAR - D

### Danish Warfarin-Dialysis Study:

Blodfortyndende behandling til forebyggelse af slagtilfælde hos patienter med dialysekrævende kronisk nyresvigt og forkammerflimren: Et nationalt lodtrækningsforsøg

#### Samtykkeerklæring fra forsøgspartageren:

Jeg bekræfter hermed, at jeg efter at have modtaget information om ovenstående forskningsprojekt, såvel mundtligt som skriftligt, indvilliger i at deltage i den beskrevne undersøgelse. Jeg er vidende om, at deltagelse heri er frivilligt, og at jeg på et hvilket som helst tidspunkt og uden begrundelse kan trække mit tilsagn om deltagelse tilbage.

#### Udfyldes af forsøgspartageren:

Dato: \_\_\_\_\_ Patientnavn: \_\_\_\_\_  
Blok bogstaver

Patientunderskrift: \_\_\_\_\_

Såfremt der tilstøder nye væsentlige helbredsoplysninger om dig i forbindelse med forskningsprojektet vil du blive informeret. Vil du **frabede** dig information om nye væsentlige helbredsoplysninger fremkommet som led i forskningsprojektet, bedes du markere her: \_\_\_\_\_ (sæt x)

Ønsker du at informeres om forskningsprojektets resultater samt eventuelle konsekvenser for dig?:

Ja \_\_\_\_\_ (sæt x)      Nej \_\_\_\_\_ (sæt x)

#### Erklæring fra den læge der indhenter informeret samtykke:

Jeg erklærer, at forsøgspartageren har modtaget mundtlig og skriftlig information om undersøgelsen, heriblandt at denne har haft mulighed for at stille spørgsmål til mig. Det er derfor min overbevisning at der er givet tilstrækkelig information til, det der kan træffes beslutning om deltagelse i forsøget.

#### Udfyldes af lægen:

Dato: \_\_\_\_\_ Lægenavn: \_\_\_\_\_  
Blok bogstaver

Lægeunderskrift: \_\_\_\_\_

Samtykke og erklæring underskrives i **2 eksemplarer** (et til forsøgspartagere, og et til afdelingens projektmappe)
